# Supplementary material for: Evolutionarily diverse determinants of meiotic DNA break and recombination landscapes across the genome
Source: HighWire-hosted journal article supplement (doi:10.1101/gr.172122.114), 2014-07-14
Supplement: Supplemental_Information.docx [file Supplemental_Information.docx]

**Supplemental information (Fowler et al.)**

**Supplemental results and discussion**

**Complex base-pair preferences at DSB sites**

Nucleotide-scale analysis of the break distribution in budding yeast revealed nonrandom base-composition at the cleavage site but no apparent consensus recognized by Spo11 ([Pan et al. 2011](#_ENREF_13)). We evaluated Rec12 biases by orienting and aligning the DNA sequences surrounding each uniquely mapped oligo (Figure S7A); terminal 3′-G’s added during oligo preparation were partly mitigated by trimming 5C’s from each sequence before mapping. We obtained similar results when multiply-mapping oligos were aligned based on their imputed positions (data not shown). We set the 5 base of each Rec12 oligo as position 0, i.e., the phosphodiester bond cleaved by Rec12 is between positions 0 and -1 (Figure S7A). Spo11 and Topo VI generate two-base 5 overhangs (de Massy et al., 1995; Liu et al., 1995; Buhler et al., 2001), so there is a predicted axis of rotational symmetry at the phosphodiester bond between positions 0 and +1

([Pan et al. 2011](#_ENREF_13)). Although there was no sequence consensus recognized by Rec12, there were distinct preferences for the bases near which it cleaves (Figure S7B). The greatest deviation in base frequency was observed from about -7 to +18 bp. This includes the ~10–12 bp region (from -5 to +6) thought to directly contact Spo11/Rec12 based on docking DNA against Top6A, the archaeal homolog of Rec12 ([Nichols et al. 1999](#_ENREF_12)), so part of this bias likely reflects aspects of the DNA substrate that encourage Rec12 binding or break formation. As in budding yeast, this bias was generally AT rich with a strong preference for an A at -4 and a T at +4 relative to the aligned 5 ends (Figure S7B).

Since Rec12 presumably acts as a dimer in attacking both backbones of the DNA, we expected the base composition on one side of the Rec12-cleavage point to mirror and complement the other (Figure S7A). While this was sometimes true (as with the A/T preference noted above), there was a clear paucity of C from 0 to +11 which did not reflect a corresponding paucity of G from +1 to -10 (Figure S7B). Likewise, G was enriched at +14 without reciprocal C enrichment at -13. We cannot discount the possibility that this G peak is an artifact of the sample preparation, since terminal G’s were incorporated to facilitate adaptor addition and PCR amplification; we think this artifact is unlikely, however, since the G bias is apparent in sequence alignments of Rec12-DNA complexes prepared without G-tailing (P. Schlögelhofer, pers. comm.). It is also conceivable that the kinetics of the clipping reaction, which liberates the Rec12-bound oligos ([Milman et al. 2009](#_ENREF_11)), differs to the left and right of the DSB or depends on the sequence context of the DSB. Alternatively, such asymmetries could imply that Rec12 can act in an uncoupled fashion, for example to produce a nick rather than a DSB. Either situation would generate an oligo from only a single strand, thereby leaving the other strand underrepresented in the population. Because base composition can influence DNA sequencing and mapping, the asymmetry may also reflect biased sequence capture. However, since this pattern is apparent from oligos sequenced using three different platforms and persisted through various filtering methods, this pattern is likely biological in nature.

Outside the hypothesized footprint of Rec12 and its partner proteins, the base composition continued to be strikingly non-random up to ~100 bp from the cleavage site. Specifically, all four bases exhibited periodic deviations from genome average, with a period of ~10 bp and diminishing amplitude with distance from the cleavage site (Figure S7B, left). Bias was strongest for A and T with a period close to the number of base pairs per turn of B-form DNA. Similar long-range bias was not observed in *S. cerevisiae* ([Pan et al. 2011](#_ENREF_13)). This pattern was independent of sequence mapping criteria and sequencing platform and was observed among oligos in various genomic contexts (Figure S7C and data not shown); thus, the pattern is unlikely driven by a subset of oligos and instead indicates a fundamental aspect of oligo formation. Hotspot oligo sites did have a stronger bias for A at -4 relative to the aligned 5 ends (Figure S7C), but this could simply be a reflection of the underlying intergenic base frequencies (~85% of hotspot oligos are in IGRs). Nucleotide skew is often associated with functional genomic elements, such as origins of replication, and interestingly there was periodic variation in AT skew, but not GC skew (Figure S7D). The 10 bp-period was also seen in the frequency of specific dinucleotides (Figure S7E). Dinucleotides with high A/T content generally exhibited the greatest periodic enrichment, though TA was an exception.

Given the length (~100 bp) of the periodic base-composition variation, it seems unlikely to reflect direct contact between the DNA and Rec12 or its partners. Moreover, since this pattern extends far outside the region covered by the Rec12 oligo itself, this cannot be an artifact of the sequencing methods. Instead, we propose that Rec12 cleaves DNA in register with another feature of the genome that is influenced by the underlying DNA sequence. The fact that the bias has a consistent 10 bp-period suggests a feature that directly interacts with DNA and involves a single face of the DNA helix. Nucleosomes are a prime candidate. We hypothesize that Rec12-oligos have a long-range base-composition bias because Rec12 preferentially forms DSBs on or adjacent to a nucleosome (Figure 5D). This hypothesis is supported by the genome-wide relationship between break formation and nucleosome occupancy, the spatial pattern of Rec12 oligos around AAATTT motifs, and the extent of the bias being comparable to the length of DNA in a single nucleosome.

Opposite the Rec12 bound end, the 3 end of the oligo is thought to be produced by a distant DNA nick, perhaps followed by exonucleolytic digestion toward the Rec12-DNA end, by Mre11 (a subunit of the MRN complex) in conjunction with Ctp1 [homolog of Sae2 (Com1) of *S. cerevisiae*] ([Milman et al. 2009](#_ENREF_11); [Rothenberg et al. 2009](#_ENREF_15); [Garcia et al. 2011](#_ENREF_6)). Aligning the sequences by this end revealed biased base composition different from that at the 5 end, presumably reflecting inherently different preferences of Rec12 and MRN-Ctp1 (Figure S7F). Besides the strong enrichment for G immediately adjacent the 3 end, which may be due to the ambiguity from terminal G-tailing, there is a prominent and unambiguous bias in favor of T immediately adjacent to the 3′ oligo end. A similar bias was observed in budding yeast ([Pan et al. 2011](#_ENREF_13)), suggesting a conserved preference.

**Estimation of total DSBs**

From least-squares linear regression of Rec12-oligo counts (RPM) versus DSB frequency (percent of total DNA broken; data from Figure S1H except in linear (non-log-transformed) space) we estimated 0.00145% DNA breakage per oligo, which was used to relate DSB frequency to oligo counts. In this analysis we assumed that all DSBs produce an oligo and constrained the regression to pass through [0, 0]. Total cellular DSBs were calculated using the sum of Rec12 oligos from all three chromosomes assuming that a DSB at a given site only occurs once per 4 chromatids. The result is 57.9 DSBs per meiosis. We further calculated a 95% confidence interval for the regression and estimated total cellular DSBs at these bounds, giving a lower estimate of 48.0 DSBs and upper estimate of 67.8 DSBs. We obtained similar results using individual hotspots instead of the regression to relate DNA breakage to oligo counts (data not shown).

**Supplemental methods**

**Preparation of Rec12 oligos for sequencing**

***Rec12-oligo complex isolation***

*S. pombe* diploid strain GP6232 (*h-/h- rec12-201::His6-FLAG2/rec12-201::His6-FLAG2 ade6-3049/ade6-3049 pat1-114/pat1-114 +/his4-239 lys4-95/+*) and haploid strain GP6010 (*h+ rec12-201::His6-FLAG2 pat1-114 ade6-3049*), carrying a functional tag on Rec12 for immunoprecipitation ([Cromie et al. 2007](#_ENREF_1)), were induced to enter meiosis as previously described ([Young et al. 2002](#_ENREF_20)) and harvested 4.5 hr later, when Rec-12-oligo complexes were at their maximal abundance ([Milman et al. 2009](#_ENREF_11)). Preparation of protein extracts, immunoprecipitation of Rec12-oligo complexes, and labeling of the Rec12-oligo complexes with [α-32P]dCTP by terminal deoxynucleotidyltransferase (TdT) were adapted from previous work ([Milman et al. 2009](#_ENREF_11)).

For the haploid strain, meiotic cells were collected from 1 L of culture (~4 gm of cells), suspended in 10% trichloroacetic acid (TCA; 1 ml/gm of cells), and broken using glass beads in a BeadBeater (Biospec Products). After centrifugation, the pellets were solubilized by boiling for 5 min in SDS solubilization solution (0.5 M Tris-HCl, pH 8.1, 2% SDS, 1 mM EDTA; 1 ml/gm of cells). The suspension was centrifuged 10 min at 16,000 x *g* at 4° C. The supernatant was mixed with an equal volume of 2x IP buffer (167 mM NaCl, 16.7 mM Tris-HCl, pH 8.1, 1.1 mM EDTA, 1.1% Triton X100 and 0.01% SDS) and incubated overnight with rotation at 4° C with magnetic protein G-agarose beads (Dynabeads; Invitrogen) pre-incubated with anti-FLAG antibody; 50 μL of beads were incubated in 5 mg/ml BSA in PBS with 10 μg of anti-FLAG antibody (clone M2; Sigma-Aldrich) per gram of cells. The beads were washed twice with TdT buffer (20 mM Tris-acetate, pH 7.9, 50 mM potassium acetate, 10 mM magnesium acetate, and 1 mM dithiothreitol), followed by three washes with 1x IP buffer. The control (mock) reaction was immunoprecipitation of a TCA extract supernatant that was depleted for Rec12-oligo complexes by previous incubation with anti-FLAG magnetic beads. This supernatant was mixed with an equal volume of 2x IP buffer and subjected to immunoprecipitation with anti-FLAG magnetic beads, as described above.

A portion (approx. 10%) of the bead suspension was removed after the final wash and subsequently labeled with [α-32P]dCTP using TdT (tracer reaction). The remaining beads were washed 3 times with 1x IP buffer. Proteins were eluted from the beads by boiling with Proteinase K buffer (100 mM Tris-HCl, pH 7.5, 0.5% SDS, 1 mM EDTA, 1 mM CaCl2). The Rec12-oligo complexes were incubated at 50° C for 2 hr with Proteinase K (1 mg/ml; Fisher, further purified by HiTrap SP HP column in order to remove contaminating DNA), and the samples (radio-labeled and non-labeled) were loaded onto a 15% polyacrylamide gel in Tris-acetate alongside size markers. The gel was exposed to a Phosphorimager overnight. Gel slices containing Rec12 oligos were incubated in 0.6 ml of 10 mM Tris-HCl, pH 8.0, at 4° C for about 16 hr, and the gel slices removed. Purified glycogen (Roche; 10 μg) was added to the solution, followed by 1.5 ml of ethanol and 55 μl of 3 M sodium acetate. After centrifugation (16,000 x *g* for 10 min) the pellet was washed with 70% ethanol and dissolved in 10 mM Tris-HCl, pH 8.0. Yields were 30–40 fmol per L of culture. Purified Rec12 oligos were ligated to adaptors and sequenced on the 454 platform (Roche) as described below.

For the diploid strain, Rec12 oligos were purified in a slightly modified manner. Cells from 2 L of *S. pombe* meiotic culture were broken and extracted with TCA, and the extracted proteins solubilized as for the haploid strain. The supernatant was mixed with an equal volume of 2x IP buffer and incubated overnight at 4° C with rotation together with 650 µl of Dynabeads pre-bound to 130 µg of anti-FLAG antibodies. The magnetic beads were washed, by application of magnetic force, three times with 10 bed-volumes of 1x IP buffer, followed by two washes with TdT buffer. After the last wash the beads were suspended in 350 µl of 2x SDS solubilization solution and boiled for 5 min. After centrifugation, the supernatant was collected. The beads were resuspended in 350 µl of 0.5x SDS solubilization solution and boiled again. The supernatant was combined with that from the previous step, and an equal volume of 2x IP solution was added. Dynabeads (100 µl) pre-bound to anti-FLAG antibodies were added to the solution, and the mixture was incubated for 2 hr at 4° C. The beads were washed as for the first round of immunoprecipitation, suspended in 200 µl of Proteinase K buffer containing 200 µg of DNA-free Proteinase K, and incubated overnight at 50° C. Beads were removed by filtration through SPIN-X columns (Corning). The eluate was supplemented with 0.3 volume of 9 M ammonium acetate, 10 μg of DNA-free glycogen [Sigma, treated with Benzonase (Novagen) to remove contaminating DNA and RNA], and 2.5 volumes of ethanol, and held on dry ice for 2 hr. To aid recovery, the tubes were spun for 10 min at 4° C at 16,000 x *g* in a microcentrifuge, rotated 180 degrees, spun for 10 min, rotated, and spun again for 10 min. Pellets were washed with 70% ethanol and dissolved in 10 mM Tris-HCl, pH 8.0. Yields were about 250 fmol per L of culture. Purified Rec12 oligos were ligated to adaptors and sequenced on the SOLiD platform (ABI) as described below.

To quantify the purified oligos, a portion was labeled with TdT and run on a 20% polyacrylamide-urea gel alongside a known amount of a synthetic oligo labeled in the same fashion; quantification was based on the relative intensities of the synthetic oligo and Rec12 oligos determined by Phosphorimager.

***Adaptor ligation***

For 454 sequencing, purified Rec12 oligos were ligated to double-stranded adaptors at their 3- and 5-ends as described previously (Pan et al., 2011). dH2O as a starting material was processed in parallel as a negative control. Briefly, at least 30 fmol of purified oligos were tailed at their 3 ends with rGTP and TdT, then ligated to a duplex adaptor with a single-stranded dC overhang (made by annealing oligos JP64 and JP65(B), Table S1) using T4 RNA ligase 2 (gift of S. Shuman, MSKCC). Complementary strands were synthesized with Klenow polymerase and extension products of ~30–80 bp (equivalent to ~10–50 nt Rec12 oligos with rG3–5 tails and ligated adaptor) were size-selected on 10% neutral polyacrylamide gels. Purified, heat-denatured complementary strands were then tailed with rGTP and TdT, ligated to another duplex adaptor (made by annealing oligos JP62(B) and JP63, Table S1) and filled in with Klenow.

For SOLiD sequencing, two independent sets of adaptor-ligated Rec12 oligos were prepared from the same batch of purified Rec12 oligos from the diploid culture as described above, except we used different double-stranded adaptors. Mock immunoprecipitation products were processed in parallel. Briefly, Rec12 oligos were tailed with rGTP, ligated to 5 pmol adaptor III (made by annealing MS300 and MS309; Table S1), and the complementary strands were synthesized with Klenow. The reaction products were precipitated with ethanol, resuspended in buffer containing formamide and separated on a 15% denaturing polyacrylamide gel. DNA in the region between ~30-80 nt was gel-purified, dissolved in 40 μl of TdT buffer containing 50 μM GTP, boiled for 5 min, rapidly chilled on ice, and supplemented with 30 units of TdT. The tailed oligos were ligated to adaptor IV (made by annealing MS154(4C) and MS155; Table S1), followed by strand synthesis.

***PCR amplification***

To estimate the yield of adaptor-ligated Rec12 oligos for 454 sequencing, test PCR was carried out as described previously (Pan et al., 2011). Template for 454 sequencing was prepared by a large-scale PCR (total volume of 640 µl) containing the desired amount of the Klenow-extended products. PCRs contained 1x PCR buffer (Invitrogen), 2 mM MgCl2, 0.2 mM dNTP, 32 units *Taq* polymerase (Invitrogen), 1 µM of each primer JP96 and JP97 (Table S2). The mixture was divided into 10 µl aliquots, denatured at 94°C for 10 s, and then amplified for 25 cycles (94°C for 10 s, 60°C for 10 s, and 72°C for 10 s). PCR products were pooled and precipitated with ethanol. The DNA pellet was dissolved in 20 µl of 10 mM Tris-HCl, pH 8.0, and separated on a 10% nondenaturing polyacrylamide gel. A gel piece containing amplified Rec12 oligos was excised, crushed, and eluted in 300 µl of 10 mM Tris-HCl, pH 8.0, at 37°C overnight with mixing. The elution mixture was spun through a SPIN-X column. DNA was precipitated with ethanol and dissolved in 20 µl of 10 mM Tris-HCl, pH 8.0. The purified amplification products were further amplified for 5 more cycles using the same PCR primers and conditions. Amplified material was sequenced on the 454 platform (Roche) in the Genomics Core Laboratory at MSKCC.

For SOLiD sequencing, test PCR was also carried out as described above to estimate the amount of adaptor-ligated Rec12 oligos, using common MS161 primer and either MS310 or MS313 primer (Table S1). Then, large-scale PCRs were conducted for 16–17 cycles, again using MS161 and either MS310 or MS313 primers, and the PCR products were purified as described above. The alternative primers provide different barcode indices for multiplexing. The two Rec12 oligo samples were mixed and multiplex-sequenced on the SOLiD platform (ABI) in the Genomics Core Laboratory at MSKCC.

**Bioinformatic analysis of Rec12 oligos**

***Mapping Rec12-oligo sequences***

Code listings are available at <http://cbio.mskcc.org/Public/Fowler_Rec12>. All sequences were mapped to the Sanger Center’s *S. pombe* genome version of 7 August 2010 using pipelines similar to the one previously described for mapping Spo11 oligos in *S. cerevisiae* ([Pan et al. 2011](#_ENREF_13)). Mapping of 454 reads was carried out using the SHRiMP mapper (rmapper-ls ver 1.2) with alignment parameters:
-m 1 -i -2 -g -4 -e -4 -h 10 -s 111101111 -n 1 -o 10000
i.e., a custom seed value, 1 seed match required, and report up to 10,000 multiple hits. The mapping efficiency of this pipeline was assessed with different alignment parameters that adjusted the ratio of match to mismatch/gap scores.

Both SOLiD datasets were mapped using a later version of the SHRiMP mapper (gmapper-cs ver 2.2.2) using a three-step alignment to allow for efficient mapping of both long and short reads. For all passes, the following global parameters were first used:

-E --strata --global -o 10000 -V -n 1 -g -100 -e -100
the rest were left at the default setting except for the seed parameter which was adjusted for each pass:

- PASS1 reads longer than 15 bp, default seeds
- PASS2 reads between 11 bp and 15 bp, -s 1111101111
- PASS3 reads shorter than 11 bp, -s 1111111

Adaptor sequences were removed from the sequence ends prior to mapping. For the 454 data an older clipping algorithm was used that searched for the best match of the adaptor sequence and computed a log likelihood for random matches using a binomial model. If an adaptor match could not be found with a positive log likelihood score, then the entire sequence was used but it was marked as having failed the adaptor removal phase for filtering in downstream analysis. Furthermore, the addition of terminal G residues to the 3 end of Rec12 oligos and the 3 end of the synthesized complementary strand resulted in ambiguity in assigning sequences where an oligo mapped to a position with one or more C residues upstream (5 side) and/or one or more G residues downstream. To account for this, sequence reads were trimmed of terminal 5-C and 3-G residues prior to mapping; if a unique map site was found with one or more C residues upstream of the trimmed sequence or one or more G residues downstream, the sequence was extended to include these ambiguous sites. Once mapped, sequences were separated into unique and multiply mapping datasets.

For the SOLiD data the 3' adaptors were clipped in color space using the cutadapt program (https://code.google.com/p/cutadapt/), which allows one to use multiple adaptors. We created a set of adaptor sequences with between 1 and 5 G bases appended to the SOLiD adaptor (in color space) and used these to trim both the adaptor and the 3'-G residues. A custom script was used to clip polyC runs on the 5' side, since the clipping needed to be done in color space. For the SOLiD maps, the oligo map position was not extended into adjacent C (5′ of the read) or G (3′ of the read) positions.

***Rec12-oligo map reproducibility***

Initial comparisons of 454 and SOLiD sequenced oligos used only uniquely mapping sequences (Figures 1B and S1B). The two maps were compared to identify discrepancies, such as sites with significantly more oligos in one map (map disparity) or on only one DNA strand (strand disparity). Irregular sites outside hotspots were analyzed for evidence of PCR artifacts or similarity to adaptor sequences. The 454 map had more map and strand disparities overall. Positions in the SOLiD maps that exhibited strand disparities tended to correlate with oligo pile-ups in the 454 map that were strand symmetric, indicating these are possibly *bone fide* Rec12 oligos. In both datasets these irregularities represented a small fraction (<3%) of the total reads and their presence did not affect the observations reported here. Because the 454 map had fewer reads compared with the SOLiD data, the 454 maps were used only to verify observations. We subsequently compared the two SOLiD datasets (technical replicates) to one another; these were highly similar (Figure S1B). These maps share practically all strand disparities and are highly quantitatively correlated (*r =* 0.995). Since these oligo positions were reproducible and had a sequence density (reads/bp) similar to that observed elsewhere in the map, including within hotspots, we infer these reflect real Rec12 oligos and that the opposite strand oligos may have been lost in our workflow.

***Hotspot identification***

Sequence reads from the combined maps (uniquely and multiply mapped reads) were pooled for the two SOLiD technical replicates, and hotspots were determined using a modification of the method described ([Pan et al. 2011](#_ENREF_13)), as follows. We smoothed the oligo frequency using a 1001 bp Hann window, then identified chromosomal domains where the smoothed frequency was >1 hit/bp (~0.19 RPM/bp). This cutoff is ~2.4-fold greater than the mean oligo density genome-wide and ~270-fold greater than the mean oligo density within rDNA. We compared results using various cutoffs and smoothing window sizes and chose these values because they gave hotspot calls that matched well with visual inspection of oligo maps in comparison with DSB distributions determined by microarray analyses ([Cromie et al. 2007](#_ENREF_1); [Hyppa et al. 2008](#_ENREF_7)) and Southern blot hybridizations ([Young et al. 2002](#_ENREF_20); [Cromie et al. 2007](#_ENREF_1)). Adjacent regions that were above this cutoff were merged if they were separated by <500 bp, so that closely spaced oligo clusters were counted as single hotspots. Hotspot boundaries were then defined as the positions within each segment of the first and last base pairs with at least one mapped read. Hotspots were then filtered to remove sites <50 bp wide and with <100 oligos. This processing yielded 603 hotspots, including one associated with the single bp mutation *ade6-3049*~~.~~

The threshold of ~0.19 RPM/bp is essentially identical to that used to identify hotspots in *S. cerevisiae* ([Pan et al. 2011](#_ENREF_13)), so hotspot compilations in the two species are directly comparable in this regard. Compared with the *S. cerevisiae* analysis, we used a larger smoothing window (1001 bp vs. 201 bp) and larger merging distance between adjacent oligo clusters (500 bp vs. 200 bp). All other things being equal, these differences would cause our *S. pombe* hotspots to appear wider than in *S. cerevisiae* even if there were no real difference. However, prior studies directly analyzing DSBs by Southern blots ([Young et al. 2002](#_ENREF_20); [Cromie et al. 2007](#_ENREF_1)) and side-by-side comparison of oligo maps between the two species (e.g., Figures 4A, 4B) demonstrate clearly that *S. pombe* hotspots are indeed much wider than their counterparts in budding yeast, justifying the use of different hotspot-calling parameters.

***Examination of sequence motifs***

The mean spatial distribution of Rec12 oligos around positions of the essential six-base core sequence bound by Atf1, 5-TGACGT ([Schuchert et al. 1991](#_ENREF_17); [Fox et al. 2000](#_ENREF_5)), was normalized by dividing the number of oligos at each base pair by the total number within a 1-kb plot window centered on the motif occurrence, and then calculating the mean frequency at each position. This normalization prevents the average profile from being dominated by a small subgroup of hexamer sites that had many more oligos mapped nearby. The pattern observed at these sites was validated using Atf1 binding sites taken from ([Eshaghi et al. 2010](#_ENREF_3)) and partitioned based on binding after treatment with H2O2. Only the Atf1 sequence sites or reported Atf1-binding sites with >140 total oligos within ±1 kb were included.

Spatial correlation between Rec12 oligos and other hexamer sequences was examined as follows. Positions in the *S. pombe* genome corresponding to each DNA hexamer were compiled, and the normalized mean oligo distribution (as above) was determined for each. Sites with fewer than 100 total oligos within a 1 kb window were excluded. This mean profile was smoothed using a 51-bp Hann window, and sequences were kept if the smoothed profile exhibited a non-random oligo distribution around the motif; namely, a ≥2-fold deviation in oligo density (peak or valley) at or immediately adjacent to the motif compared with the profile’s mean value 500 bp away (an indication of background). Sequence motifs were then visually inspected to identify those most strongly correlated with Rec12-oligos.

Sequences similar to those identified above were investigated further to determine if related motifs also correlated with Rec12-oligos. To this end, each motif was iteratively changed to create a library of sequences that differed by a single base change, and each of these new sequences was analyzed as above. This analysis used relaxed criteria for identifying sequences of interest, requiring only a 1.25-fold deviation in the Rec12-oligo profile at or immediately adjacent to the motif and positive covariance with the break profile of the original motif.

***Base composition analysis***

To analyze the DNA sequence context at Rec12 oligos, we compiled DNA sequences ± 50 nucleotides around the 5 end of each Rec12 oligo using the DNA strand from which the oligo originated. We determined the base composition around Rec12 cleavage sites by calculating the frequency of each mono- and di-nucleotide at each position. The analysis presented in Figure S7 used oligo positions derived from the unique map; similar results were obtained using positions in the combined map (unique and imputed oligos) with >1 oligo (data not shown). Furthermore, we calculated these frequencies using either each cleavage position once or each position in proportion to the oligo frequency and obtained indistinguishable results (data not shown). For simplicity, only the former method is presented.

The periodic mono- and di-nucleotide frequencies around Rec12 cleavage sites were investigated as follows. We partitioned oligos based on numerous criteria (e.g. originating in hotspots, cold-regions, genes, or inter-genic regions, or based on meiotic transcriptional activity) and analyzed the base composition within each partition as above. In each case periodic base composition bias was still apparent (data not shown), indicating that this attribute is either inherent to Rec12 or due to a more ubiquitous feature of the genome.

***Mappability of Rec12 oligo-like sequences***

We conservatively estimated how frequently Rec12-oligo sequences near NDRs could be mapped uniquely as follows. First, we determined an appropriate sequence length based on the mappability of random *S. pombe* genome sequences. To this end, we used a sliding window of various lengths to compile all sequences from ± 500 bp of all NDRs (i.e., 1 bp step). These sequences were then aligned back to the genome requiring complete identity. For comparison we re-mapped the same number and length of sequences sampled from random positions in the *S. pombe* genome. For each window size we calculated the frequency that sequences mapped uniquely and found that 14-mers near NDRs had the greatest difference compared with random genomic sequences. We then calculated the mean frequency that 14 nucleotide sequences from each position relative to the NDR (i.e. -500, -499, etc.) were able to re-map uniquely. Furthermore, we similarly generated all 14 nucleotide sequences from the entire nuclear genome and calculated the mean unique mapping frequency for comparison.

**Supplemental references**

Buhler, C., Lebbink, J.H., Bocs, C., Ladenstein, R., and Forterre, P. (2001). [DNA topoisomerase VI generates ATP-dependent double-strand breaks with two-nucleotide overhangs.](http://www.ncbi.nlm.nih.gov/pubmed/11485995) J Biol Chem *276*: 37215-37222.

Chen HM, Rosebrock AP, Khan SR, Futcher B, Leatherwood JK. 2012. Repression of meiotic genes by antisense transcription and by Fkh2 transcription factor in Schizosaccharomyces pombe. PLoS One 7: e29917.

Cromie GA, Hyppa RW, Cam HE, Farah JA, Grewal SHIS, Smith GR. 2007. A discrete class of intergenic DNA dictates meiotic DNA break hotspots in fission yeast. *PLoS Genet* 3: e141.

Cromie GA, Rubio CA, Hyppa RW, Smith GR. 2005. A natural meiotic DNA break site in *Schizosaccharomyces pombe* is a hotspot of gene conversion, highly associated with crossing over. *Genetics* 169: 595-605.

Eshaghi M, Lee JH, Zhu L, Poon SY, Li J, Cho KH, Chu Z, Karuturi RK, Liu J. 2010. Genomic binding profiling of the fission yeast stress-activated MAPK Sty1 and the bZIP transcriptional activator Atf1 in response to H2O2. *PLoS One* 5: e11620.

Fowler KR, Gutiérrez-Velasco S, Martín-Castellanos C, Smith GR. 2013. Protein determinants of meiotic DNA break hotspots. *Mol Cell* 49: 983-996.

Fox ME, Yamada T, Ohta K, Smith GR. 2000. A family of CRE-related DNA sequences with meiotic recombination hotspot activity in *Schizosaccharomyces pombe*. *Genetics* 156: 59-68.

Garcia V, Phelps SE, Gray S, Neale MJ. 2011. Bidirectional resection of DNA double-strand breaks by Mre11 and Exo1. *Nature* 479: 241-244.

Hyppa RW, Cromie GA, Smith GR. 2008. Indistinguishable landscapes of meiotic DNA breaks in *rad50+*and *rad50S* strains of fission yeast revealed by a novel *rad50+* recombination intermediate. *PLoS Genet* 4: e1000267.

Hyppa RW, Smith GR. 2010. Crossover invariance determined by partner choice for meiotic DNA break repair. *Cell* 142: 243-255.

Lantermann AB, Straub T, Stralfors A, Yuan GC, Ekwall K, Korber P. 2010. Schizosaccharomyces pombe genome-wide nucleosome mapping reveals positioning mechanisms distinct from those of Saccharomyces cerevisiae. *Nat Struct Mol Biol* 17: 251-257.

Milman N, Higuchi E, Smith GR. 2009. Meiotic DNA double-strand break repair requires two nucleases, MRN and Ctp1, to produce a single size class of Rec12 (Spo11)-oligonucleotide complexes. *Mol Cell Biol* 29: 5998-6005.

Nichols MD, DeAngelis K, Keck JL, Berger JM. 1999. Structure and function of an archaeal topoisomerase VI subunit with homology to the meiotic recombination factor Spo11. *EMBO J* 18: 6177-6188.

Pan J, Sasaki M, Kniewel R, Murakami H, Blitzblau HG, Tischfield SE, Zhu X, Neale MJ, Jasin M, Socci ND et al. 2011. A Hierarchical combination of factors shapes the genome-wide topography of yeast meiotic recombination initiation. *Cell* 144: 719-731.

Rhind N, Chen Z, Yassour M, Thompson DA, Haas BJ, Habib N, Wapinski I, Roy S, Lin MF, Heiman DI et al. 2011. Comparative functional genomics of the fission yeasts. *Science* 332: 930-936.

Rothenberg M, Kohli J, Ludin K. 2009. Ctp1 and the MRN-complex are required for endonucleolytic Rec12 removal with release of a single class of oligonucleotides in fission yeast. *PLoS Genet* 5: e1000722.

Schneider TD, Stephens RM. 1990. Sequence logos: a new way to display consensus sequences. *Nucleic Acids Res* 18: 6097-6100.

Schuchert P, Langsford M, Kaslin E, Kohli J. 1991. A specific DNA sequence is required for high frequency of recombination in the ade6 gene of fission yeast. *EMBO J* 10: 2157-2163.

Soriano I, Quintales L, Antequera F. 2013. Clustered regulatory elements at nucleosome-depleted regions punctuate a constant nucleosomal landscape in Schizosaccharomyces pombe. *BMC Genomics* 14: 813.

Steiner WW, Schreckhise RW, Smith GR. 2002. Meiotic DNA breaks at the *S. pombe* recombination hotspot *M26*. *Mol Cell* 9: 847-855.

Young JA, Schreckhise RW, Steiner WW, Smith GR. 2002. Meiotic recombination remote from prominent DNA break sites in *S. pombe*. *Mol Cell* 9: 253-263.

**Supplemental figure legends**

**Figure S1**. Rec12-oligo sequencing. (*A*) Specificity of PCR amplification of Rec12 oligos ligated to adaptors. Platform-specific sequencing adaptors were ligated to Rec12 oligos. PCR was seeded with a small portion of the 454 (left gel) or SOLiD (right gel) adaptor-ligated Rec12 oligos, or of samples processed from dH2O or mock immunoprecipitates; the 454 amplification used oligos JP96 and JP97, and the SOLiD amplification used oligos MS161 and MS310 (Table S1). DNA was separated by neutral polyacrylamide gel electrophoresis. The second technical preparation of SOLiD-adapted oligos produced similar results (data not shown). Vertical bar indicates expected range of Rec12-oligo amplicons; asterisk indicates adaptor dimers. (*B*) Correlation between technical and biological replicates. Rec12 oligos in each dataset were summed in non-overlapping 5 kb windows and log10 transformed. The red line indicates unity; *r* is the Pearson correlation coefficient. (*C*) Numbers of uniquely-mapping oligos correlate with numbers of multi-mappers at 288 previously identified hotspots (Fowler et al. 2013). Oligos with multiple map positions were fractionally assigned based on the number of map sites to which each mapped, then read counts were summed across hotspots and compared with uniquely mapping oligos. The black line indicates the linear regression; *r* is the Pearson correlation coefficient. (*D*) Multi-mapper oligos spatially correlate with unique-mappers. Multi-mappers were fractionally assigned as in panel C and compared with uniquely mapping oligos at a representative hotspot (top). Expanding a small part of the hotspot (bottom) shows the precise spatial correlation between unique and multi-mappers. (*E*) Among the positions at which a multi-mapper oligo maps, one is often a hotspot, as in the example shown here. All positions at which an individual multi-mapper oligo mapped were identified and the frequency of unique oligos around each site was plotted (red line indicates the multi-mapper site). Such sites often exhibit a pile-up of multi-mappers at just a single position with few or no other mapped reads nearby (e.g. map sites 1 and 2; data not shown), from which we infer that these reflect improper assignment of oligos that actually came from the hotspot (site 3). (*F*) Scheme for imputing the most likely map position of multi-mappers. Rec12 oligos that could be uniquely mapped to the genome were used to generate a “unique map.” Multiply-mapping sequences were assigned proportionally to each position based on the number of unique oligos within ± 250 bp of the site to generate a “combined map”, which was used for subsequent analyses. (*G*) Rec12 oligos appear frequently outside hotspots but rarely in repetitive regions. Rec12 oligos from the combined map (unique plus imputed multi-mappers) were summed across each class of chromosomal region and their density determined (RPM/kb). To determine the oligo density in the repetitive rDNA, oligos mapping to the repeats present in the reference genome were summed, divided by the length of rDNA in the reference genome, and further divided by 65, our estimate of the number of rDNA repeats per cell in our laboratory strains. For comparison, the mean oligo density in hotspots is 641 RPM/kb, with a maximum density of 5021 RPM/kb. (*H*) Rec12-oligo frequency correlates with a physical assay of DSB frequency. Rec12 oligos were summed across 25 DSB hotspots where break frequency was previously measured by Southern blot hybridizations ([Cromie et al. 2007](#_ENREF_1)) and compared with the percent DNA broken. The red line indicates the linear regression of the log-transformed data; dashed lines indicate 95% confidence limits of the regression; *r* is the Pearson correlation coefficient. The slope of the regression line is 0.828 (95% CI = 0.549–1.06), not significantly different from 1 (p>0.21).

**Figure S2**. Characteristics of Rec12-oligo hotspots.(*A*) Newly identified, low-level hotspots correlate with DSBs and DSB-promoting factors measured by ChIP-chip. Hotspots of break formation were determined from the sequenced oligos, and those that overlapped previously identified hotspots by microarray hybridization of Rec12-DNA complexes ([Fowler et al. 2013](#_ENREF_4)) were removed. These remaining (new) hotspots were aligned, and the mean microarray signals for immunoprecipitated Rec12, Rec25, Rec27, and Mug20 were analyzed [left panels;([Fowler et al. 2013](#_ENREF_4))]. Profiles for the shared hotspots are shown on the right for comparison. For each hotspot, the microarray IP/Input values were normalized by dividing by the total signal within the plot window around the hotspot. The normalized values were then averaged across all of the hotspots. This analysis thus specifically focuses on spatial relationships and avoids having signal from the strongest sites dominating the profiles. These new hotspots clearly had DSB signal determined by microarray analyses but were previously not considered sufficient to be classed as hotspots. These hotspots also show local enrichment for DSB-promoting factors Rec25, Rec27, and Mug20. The hotspots observed by both microarray hybridization and Rec12-oligo sequencing correlate strongly with all of these factors (right panels). (*B*) Hotspot width correlates positively with break density. The width and density of oligo formation (RPM/kb) at each hotspot were determined and plotted. Oligo density does not vary linearly with hotspot width, resulting in wider hotspots having disproportionately more breaks. “Strong” and “Weak” hotspot examples and definitions are in Figures 2A and 2B. (*C*) Distribution of hotspot occurrences within IGRs. IGRs that overlap a hotspot were determined, and the degree of overlap was calculated as the fraction of the IGR that is within a hotspot. Note the relatively uniform distribution of overlap fractions; the large number at 100% overlap is uninformative in this regard, as it contains all IGRs smaller than their overlapping hotspots, regardless of how much or how little the hotspot extends beyond the IGR boundaries. Left inset shows the number of IGRs with a hotspot encompassing less than or greater than 90% of the IGR; right inset shows the width distribution of these two IGR bins (IGR widths 0-500 bp, 500-5000 bp, 5-20 kb, from dark to light). (*D*) Oligos correlate with ncRNAs. Previously identified ncRNAs ([Rhind et al. 2011](#_ENREF_14)) and their upstream and downstream regions were oriented and scaled to be the same size and direction. The upstream and downstream regions of each RNA were set equal to the RNA length to remain proportionally consistent. The mean number of Rec12-oligos was then determined across these sites. Oligo counts were normalized to the total at each ncRNA (as in Figure 5A). Red lines indicate the TSS and TES. (*E*) Intergenic Rec12-oligo density correlates with the orientation of flanking transcription units and is less dense overall than intergenic Spo11 oligos. Intergenic regions from *S. pombe* or *S. cerevisiae* were grouped based on the orientation of adjacent transcription units and oligo densities calculated for each group. The thick horizontal line indicates the median, upper and lower box boundaries indicate upper and lower quartiles, and the dashed whiskers indicate the most extreme values within 1.5 times the interquartile range; outliers were omitted. The inset shows the *S. pombe* oligo densities ordered as in the main figure. The dashed black lines indicate the *S. pombe* genome average.

**Figure S3**. Relation between Rec12-oligo frequency and genetic distance. (*A*) Genetic interval key. Reproduction of Figure 3A with individual genetic intervals labeled and referenced in Supplemental Table S4. Intervals with replicate map length measurements were averaged and the mean plotted. (*B*) Genetic distance correlates with physical distance except for small intervals containing hotspots. For each genetic interval in Figure 3A, the physical and genetic lengths are compared. The small intervals containing the *mbs1* and *ade6-3049* hotspots are indicated. The black line indicates the linear regression of the black points; *r* is the Pearson correlation coefficient. (*C*) Crossover (CO) frequency calculated from Rec12-oligo counts indicates an average of 27–38 crossovers per cell. Rec12 oligos were summed across the 603 hotspots determined here and rank ordered. Based on oligo frequency, the extent of DSB repair with the homolog at each hotspot was modeled from 100% to 20% using various functions: red, step function with a single step at the middle of the hotspot oligo range; blue, sigmoid function from the logistic regression of the cumulative normal distribution with a mean and standard deviation of 1; black, linear function from the coldest to the hottest hotspot; green, exponential function from the exponential probability density function with a rate of 1. The fraction of repair events with the homolog at each hotspot was calculated and summed. Cold-region oligos were added assuming that they exhibit complete homolog repair bias. This oligo sum was then divided by the total number of nuclear oligos, giving the total fraction of DSBs repaired with the homolog. CO counts for each model were then calculated assuming 75% of inter-homolog repair results in a CO (based on ~75% CO association with gene conversion ([Cromie et al. 2005](#_ENREF_2))) and 58 DSBs per cell (i.e. *inter-homolog fraction* * 0.75 * 58). For each algebraic model, we further calculated the fraction of COs arising from hotspots and cold-regions. “Strong” and “weak” hotspots are as defined in Figures 2A and 2B.

**Figure S4**. Rec12 oligo patterning at NDRs is not due to biased DNA composition and poor mappability, as DNA in the middle of NDRs is in fact more readily mapped than is average genomic DNA. The DNA sequence around NDRs was assessed for mappability artifacts as follows: all 14-mer sequences (see Supplemental Experimental Procedures for this choice) within ± 1 kb of each NDR were compiled from both strands (as a sliding window with a 1 bp step) and matched back to the *S. pombe* genome; sequences that mapped only to the originating locus were deemed “unique,” and the fraction of “unique” sequences at each position relative to the NDR was plotted (black line). We similarly calculated the mean frequency of uniquely mapped 14-mers from the entire nuclear genome, indicated by the red line. The mean mononucleosome coverage at NDRs (gray) is plotted for reference. The NDR boundaries have poorer sequence mappability, likely due to the biased A/T content of nucleosome-bound DNA. Oligos in the middle are thus overrepresented relative to the sides.

**Figure S5**. Rec12 oligos are associated with known TF binding sites. (*A*) The spatial correlation between Rec12 oligos and Atf1-Pcr1 binding motifs (5′-TGACGT) is partially context-dependent. Positions in the genome matching the six base-pair core Atf1-Pcr1 binding motif were aligned, and the mean profiles of normalized oligo counts were determined as in Figure 5A. Sites were binned based on their context and those with fewer than 140 oligos within ± 1 kb were excluded, as in Figure 6A. (*B*) Nearly symmetric Atf1-Pcr1 dependent breakage at *ade6-3049*. Breakage induced in the *ade6* gene (orange arrow) with the *ade6-3049* single base-pair mutation is roughly symmetric around the site of the mutation (black circle). The site of the mutation, creating the Atf1 binding motif (TGACGT), has local oligo depletion (inset), as noted previously by Southern blot hybridization ([Steiner et al. 2002](#_ENREF_19)). This nearly symmetric break pattern contrasts with that observed at many other Atf1-Pcr1 binding sites (Figure 6B). (*C*) Sites bound by Atf1 after oxidative stress correlate with Rec12-oligos. 250 sites bound by Atf1 ([Eshaghi et al. 2010](#_ENREF_3)) after H2O2 treatment (blue) and 72 sites bound only in the absence of treatment (red) with at least 140 oligos within ± 1 kb were aligned (most sites are bound under both conditions), and the normalized mean oligo counts were determined, as in panel *A*. Red and blue ticks along the top indicate relative positions of Atf1 binding motifs (TGACGT) for the binding sites averaged in the red and blue oligo profiles. Note that the break pattern around sites bound after oxidative stress (blue) spatially correlates with the binding motif’s positions, as in (A), but is slightly offset from the experimentally determined binding sites. (*D*) Many TF motifs are enriched in hotspots and IGRs. The *S. pombe* genome was partitioned into hotspot and non-hotspot, and separately into genes and IGRs. For each TF binding motif (e.g. TGACGT), positions in the genome with the sequence were determined and the fraction of total motif occurrences that overlapped hotspots or IGRs were plotted. The vertical red and blue dashed lines indicate the fraction of the *S. pombe* genome in the hotspot and IGR partitions, respectively, and represent the expected overlap fraction given a random occurrence. Filled bars indicate statistically significant differences from random (Pearson’s chi-square test; p ≤ 0.001). (*E*) CCAAT hotspot sequences also correlate with Rec12 oligos. As in Figure 6A, genome positions with the essential core binding sequence of CCAAT hotspots, 5′-CCAATCA, were oriented and aligned, and oligo counts determined. Sites with fewer than 140 oligos within ± 1 kb were excluded. Note that this motif tends to be depleted for mononucleosomes [gray ([Soriano et al. 2013](#_ENREF_18))]. (*F*) Oligo-C hotspot sequences are also associated with Rec12 oligos. As in panel *E*, positions with the core binding sequence of oligo-C hotspots, 5′-CCCCGC, were aligned and oligo counts normalized. Sites with fewer than 140 oligos within ± 1 kb were excluded. As at CCAAT hotspot motifs, these sites also tend to be depleted for nucleosomes.

**Figure S6.** Rec12 oligos are associated with novel sequence motifs.(*A*) Sequences similar to 5′-ACTGCT correlate with oligos. Sites containing motif variants differing by one base from the ACTGCT sequence were examined, and those spatially associated with Rec12-oligo formation were retained. For each retained sequence, the mean normalized oligo profile was determined (as in Figure 5A) and binned in 2 bp non-overlapping bins. The oligo profile was then plotted as a heatmap, which shows that each motif (aligned at 0) is associated with preferential oligo formation nearby. A PWM for these sequences is represented by a cartoon logo ([Schneider and Stephens 1990](#_ENREF_16)) in Figure 6D. (*B*) Sequences similar to 5′-ACACAC also correlate with oligos. Rec12-oligo profiles were determined as in panel *A* starting with the ACACAC sequence motif. (*C*) Some sequence motifs are over-represented in hotspots and IGRs. Labeling is as in Figure S5D. (*D*) The spatial correlation between oligos and ACTGCT-like sequences is site-dependent. Using the ACTGCT-like PWM, we determined positions in the genome with ≥ 95% similarity and determined mean normalized Rec12-oligo profiles for each site. Sites with fewer than 140 oligos within ± 1 kb were excluded. Sites were then clustered based on the side of the motif with greater oligo counts (see Figure 6B) and plotted as a heatmap. (*E*) Rec12 oligos near ACTGCT-like motifs correlate with meiotic transcript abundance, similar to the pattern observed at the Atf1-Pcr1 binding motif (TGACGT). Mean transcript abundance ([Chen et al. 2012](#_ENREF_5)) was determined for the two clusters in panel D as for Figure 6C; red and blue indicate transcript abundance on the plus and minus strands, respectively, relative to the sequence motif. (*F*) Mean Rec12-oligo formation around 5′-AATT and 5′-AAATTT sequences is periodic. Genomic positions with the AATT (blue) or AAATTT (red) sequence were determined and aligned. The normalized mean Rec12-oligo pattern was then determined as in Figure 5A and smoothed with a 5 bp Hann window for clarity (top). Sites with fewer than 140 oligos within ± 1 kb were excluded. Both profiles have a strong bias for oligo formation to be at a repeating distance from the motif and are associated with higher nucleosome occupancy in mitosis than meiosis (bottom panels). The Rec12-oligo peaks correspond with distinct isolated clusters of breakage (Figure 6E and data not shown).

**Figure S7.** Base-composition biases associated with Rec12 oligos. (*A*) Schematic of Rec12-oligo formation and sequence alignment. The top cartoon shows duplex DNA (top) cleaved by a Rec12 dimer (filled circles), generating two bi-oriented Rec12-oligos (blue N’s). A two-base 5′ overhang is shown, based on properties of budding yeast Spo11 and archaeal topoisomerase VI. The bottom cartoon shows DNA sequences at Rec12 oligos co-oriented 5′→3′ and aligned relative to the oligo end for base-composition analyses. (*B*) Base frequencies around Rec12-oligo sites are non-random and periodic. All Rec12-oligo originating sites were oriented with their 5′ terminal base at 0 and the oligo position extending to the right. The mean base composition to each side was then determined. Frequencies immediately adjacent to 0 have low certainty due to mapping ambiguity because of oligo tailing prior to adaptor ligation. (*C*) Oligos in hotspots and cold regions share the same biased base composition. Rec12-oligos that originated within or outside hotspots were analyzed separately as in panel B. Randomized frequencies (horizontal black line) were generated by shuffling cold-region oligo sites randomly among the cold genome (i.e. excluding hotspot DNA). (*D*) Oligo sites show periodic bias in A/T skew (main panel) but not G/C skew (inset). A/T skew is (A-T)/(A+T); G/C skew is (G-C)/(G+C). The central four positions were omitted for clarity because of bias from mapping ambiguity. (*E*) Dinucleotide frequencies around the 5′ Rec12 cleavage site are biased, and some are periodic. Rec12 oligos were aligned by their 5′ ends, and the mean dinucleotide composition at each position was determined. As in panel *B*, positions immediately adjacent to the 5′ end have skewed frequencies due to end-tailing. (*F*) Base frequencies around the Rec12-oligo 3′ end are non-random. The terminal 3′ base is set at 0, and oligos extend to the left. As in panel B, positions immediately adjacent to the 3′ end may reflect skewed frequencies due to end-tailing.

**Supplemental tables**

**Table S1. Primers used in this study**

| Name | Sequence |
| --- | --- |
| JP62(B)*a* | 5-ACACGCAACGGAATTCGTCAGCGGCCC |
| JP63*a* | 5-pCCGCTGACGAATTCCGTTGCGTG-3-3-T*b* |
| JP64*a* | 5-pCCTGCAGGGAATTCCAGCTAGTC-3-3-T*b* |
| JP65(B)*a* | 5-AGACTAGCTGGAATTCCCTGCAGGCCCC |
| JP96 | 5-GCCTCCCTCGCGCCATCAGCGCAACGGAATTCGTCAGCG |
| JP97 | 5-GCCTTGCCAGCCCGCTCAGCTAGCTGGAATTCCCTGCAGGC |
| MS154(4C)*a* | 5-AACCACTACGCCTCCGCTTTCCTCTCTATGGGCAGTCGGTGATCCCC |
| MS155*a* | 5-pATCACCGACTGCCCATAGAGAGGAAAGCGGAGGCGTAGTGGTT-3-3-T*b* |
| MS161 | 5′-CCACTACGCCTCCGCTTTCCTCTCTATG |
| MS300*a* | 5-pCGCCTTGGCCGTACAGCAG-3-3-T*b* |
| MS309*a* | 5-CTGCTGTACGGCCAAGGCGCCCC |
| MS310 | 5′-CTGCCCCGGGTTCCTCATTCTCTGTGTAAGAGGCTGCTGTACGGCCAAGGCGC |
| MS313 | 5′-CTGCCCCGGGTTCCTCATTCTCTGGATGCGGTCCTGCTGTACGGCCAAGGCGC |

*a* These primers are used to generate double-stranded adaptors by annealing the oligos, followed by purification by neutral polyacrylamide gel electrophoresis.

*b* The oligonucleotides are 5-phosphorylated, and blocked at their 3 ends with an inverted 3-3 linked dT.

**Table S2. Sequencing and mapping statistics for Rec12 oligos**

| Platform | Total sequenced | Total mapped | Unique | Multi |
| --- | --- | --- | --- | --- |
| 454 | 251,159 | 196,515 (78.2%)* | 164,978 (84.0%) | 31,537 (16.0%) |
| SOLiD 1 (sample 310) | 10,384,246 | 2,043,551 (19.7%)* | 1,529,153 (74.8%) | 514,398 (25.2%) |
| SOLiD 2 (sample 313) | 7,695,953 | 3,142,154 (40.8%)* | 2,540,337 (80.8%) | 601,817 (19.2%) |
| SOLiD total | 18,080,199 | 5,185,705 (28.7%) | 4,069,490 (78.5%) | 1,116,215 (21.5%) |

* Mapping efficiencies were poor overall due to the presence of significant amounts of adaptor dimers, which are difficult to separate from Rec12 oligos by gel purification. This necessitated the use of stringent mapping criteria. SOLiD sequences mapped with especially low efficiency due to the nature of the platform and the short length of Rec12 oligos.
