# Supplementary material for: Evolutionarily diverse determinants of meiotic DNA break and recombination landscapes across the genome
Source: HighWire-hosted journal article supplement (doi:10.1101/gr.172122.114), 2014-07-14
Supplement: Supplemental_Table_3.xlsx [file Supplemental_Table_3.xlsx]

## Sheet: Supplementary table S3
Chr.	Start	End	Length	Oligo count†	Peak pos.	Median pos.‡	Type
1	58980	59757	778	1918.37	59394	59412	Weak
1	64020	64497	478	778.311	64267	64256	Weak
1	66585	67272	688	1599.55	66919	66900	Weak
1	70846	71137	292	344.749	70989	70948	Weak
1	71776	72030	255	449.066	71905	71861	Weak
1	76572	77129	558	913.725	76840	76781	Weak
1	81307	82547	1241	2559.2	81703	81834	Weak
1	86491	88012	1522	6718.61	87496	87430	Strong
1	93680	95649	1970	4401.07	94099	94245	Weak
1	99362	99934	573	1038.4	99642	99605	Weak
1	100737	101558	822	1379.35	101125	101174	Weak
1	103252	105387	2136	15476.9	103886	104176	Strong
1	106486	108370	1885	3763.27	107836	107715	Weak
1	109284	109539	256	400.63	109411	109414	Weak
1	112933	114236	1304	3875.82	113465	113494	Weak
1	122684	124114	1431	1873.36	123883	123324	Weak
1	155415	156584	1170	5015.5	156148	156167	Strong
1	158082	159928	1847	5497.12	159306	159208	Strong
1	162297	163395	1099	3048.1	162960	162976	Weak
1	164248	164826	579	1094.12	164527	164544	Weak
1	176610	177046	437	612.982	176832	176812	Weak
1	207918	208509	592	1008.99	208206	208176	Weak
1	214626	215864	1239	2411.88	215334	215298	Weak
1	237427	240748	3322	21864.3	238119	238789	Strong
1	243364	243649	286	520.28	243504	243510	Weak
1	253928	255078	1151	1920.33	254664	254523	Weak
1	325200	326625	1426	3272.84	326184	325939	Weak
1	380663	383629	2967	15022	382762	382478	Strong
1	410485	410976	492	729.853	410719	410706	Weak
1	429135	430301	1167	2766.42	429846	429835	Weak
1	433946	434082	137	142.744	434013	434006	Weak
1	438798	442295	3498	19646.7	440130	440136	Strong
1	453230	456101	2872	12910.1	453800	454118	Strong
1	459544	461961	2418	24775	460745	460723	Strong
1	464053	464792	740	1590.4	464443	464486	Weak
1	469781	470213	433	718.051	469999	470002	Weak
1	518577	520623	2047	6919.65	519357	519367	Strong
1	522437	523074	638	1246.99	522754	522751	Weak
1	576863	578219	1357	3368.8	577702	577664	Weak
1	597967	598194	228	459.688	598079	598059	Weak
1	634280	634818	539	815.957	634551	634525	Weak
1	649567	650348	782	1036.25	650155	650076	Weak
1	659801	663591	3791	17387.4	661795	661618	Strong
1	667327	667612	286	426.403	667454	667427	Weak
1	693221	693744	524	770.731	693484	693445	Weak
1	761204	767307	6104	28024.8	762144	762951	Strong
1	786696	787362	667	1003.39	787081	787118	Weak
1	842798	843383	586	1116.49	843094	843109	Weak
1	843931	845639	1709	7322.95	844719	844758	Strong
1	869589	871174	1586	4099.12	870755	870532	Weak
1	928107	929983	1877	6016.14	928653	929126	Strong
1	933348	934891	1544	5095.42	933869	933936	Strong
1	958658	960274	1617	8631.15	959709	959714	Strong
1	964958	967137	2180	18477.6	966297	966279	Strong
1	983465	983769	305	518.055	983621	983635	Weak
1	993910	994988	1079	1660.76	994665	994554	Weak
1	998003	998759	757	1389.78	998411	998416	Weak
1	1003325	1004988	1664	4126.34	1003723	1004114	Weak
1	1026382	1028223	1842	5153.77	1027160	1027241	Strong
1	1072610	1074269	1660	5579.05	1073227	1073299	Strong
1	1083214	1084094	881	2996.89	1083669	1083677	Weak
1	1149073	1153794	4722	31959	1151813	1151709	Strong
1	1165720	1166471	752	1222.02	1166111	1166101	Weak
1	1176028	1176674	647	1040.44	1176373	1176388	Weak
1	1189110	1190403	1294	2037.17	1189426	1189719	Weak
1	1191068	1191524	457	727.811	1191296	1191304	Weak
1	1205801	1206929	1129	2562.85	1206415	1206351	Weak
1	1236639	1239243	2605	22239.6	1238140	1238015	Strong
1	1263439	1263711	273	460.676	1263566	1263596	Weak
1	1289338	1291382	2045	8162.03	1290802	1290515	Strong
1	1357376	1361502	4127	24656.5	1360826	1359984	Strong
1	1375169	1377009	1841	9309.22	1375878	1375880	Strong
1	1453618	1455054	1437	7099.89	1454185	1454205	Strong
1	1481267	1482758	1492	6023.76	1482209	1482118	Strong
1	1494223	1496409	2187	4888.15	1494834	1495091	Strong
1	1508079	1508859	781	1187.22	1508466	1508411	Weak
1	1539089	1542673	3585	18475.8	1541520	1541090	Strong
1	1549671	1550211	541	1003.35	1549938	1549936	Weak
1	1572524	1573372	849	1194.99	1573054	1572986	Weak
1	1597554	1600453	2900	13375.6	1598800	1598853	Strong
1	1607023	1608162	1140	3383.17	1607504	1607517	Weak
1	1618780	1620032	1253	2520.23	1619450	1619413	Weak
1	1629950	1631471	1522	6623.07	1630695	1630650	Strong
1	1663166	1663346	181	162.736	1663256	1663271	Weak
1	1664648	1668085	3438	25808.3	1666563	1666567	Strong
1	1772309	1774593	2285	15819.8	1774009	1773762	Strong
1	1798522	1799053	532	970.682	1798794	1798823	Weak
1	1824154	1824451	298	447.951	1824305	1824343	Weak
1	1837052	1838491	1440	2835.66	1838100	1837833	Weak
1	1849098	1851640	2543	9407.91	1851112	1850637	Strong
1	1874870	1875534	665	944.377	1875234	1875195	Weak
1	1889527	1890577	1051	2299.85	1889988	1890028	Weak
1	1904747	1907226	2480	6411.09	1905415	1905647	Strong
1	1921119	1922034	916	2140.64	1921617	1921596	Weak
1	1943504	1943955	452	690.725	1943730	1943730	Weak
1	1951057	1958120	7064	55984.1	1955009	1955267	Strong
1	1982270	1982490	221	382.599	1982379	1982342	Weak
1	2026932	2027257	326	573.451	2027088	2027123	Weak
1	2063979	2064201	223	391.587	2064092	2064074	Weak
1	2065880	2067097	1218	6588.24	2066425	2066420	Strong
1	2072702	2074296	1595	6693.49	2073731	2073669	Strong
1	2076994	2077129	136	314.755	2077063	2077050	Weak
1	2092961	2096047	3087	10508.6	2093638	2093976	Strong
1	2124238	2125882	1645	5967.97	2124932	2124955	Strong
1	2143328	2145692	2365	19918.4	2144072	2144269	Strong
1	2176202	2177977	1776	3007.32	2177519	2177122	Weak
1	2202566	2203388	823	1715.5	2202988	2203012	Weak
1	2208828	2209453	626	1088.45	2209140	2209117	Weak
1	2262923	2263529	607	1028.13	2263245	2263241	Weak
1	2264124	2265088	965	2276.92	2264548	2264544	Weak
1	2276202	2277158	957	1725.57	2276796	2276753	Weak
1	2289528	2292183	2656	60575.7	2290440	2290615	Strong
1	2297712	2298039	328	546.412	2297854	2297863	Weak
1	2321549	2323665	2117	6754.82	2322213	2322571	Strong
1	2325578	2325849	272	338.29	2325702	2325636	Weak
1	2326465	2327949	1485	4591.97	2327405	2327285	Strong
1	2338007	2338315	309	517.316	2338165	2338161	Weak
1	2353191	2354072	882	3203.94	2353585	2353539	Weak
1	2359557	2360381	825	1582.73	2359957	2359964	Weak
1	2376894	2376950	57	139.788	2376923	2376942	Weak
1	2380778	2382563	1786	4041.19	2381406	2381460	Weak
1	2391828	2392535	708	1307.4	2392154	2392189	Weak
1	2394155	2394927	773	1986.39	2394530	2394538	Weak
1	2396655	2398824	2170	10381	2398234	2398078	Strong
1	2415088	2416049	962	2000.94	2415553	2415540	Weak
1	2418141	2418509	369	603.076	2418325	2418316	Weak
1	2423480	2426172	2693	16047.1	2424194	2424582	Strong
1	2450343	2451807	1465	9901.11	2451007	2451036	Strong
1	2472580	2473555	976	2433.43	2473034	2473008	Weak
1	2497931	2498378	448	708.421	2498156	2498120	Weak
1	2509744	2510256	513	844.192	2509994	2509985	Weak
1	2518204	2521137	2934	35745.2	2520165	2520082	Strong
1	2524526	2525987	1462	2844.46	2524899	2524960	Weak
1	2542716	2545062	2347	13077.3	2543357	2543630	Strong
1	2607506	2607827	322	429.678	2607666	2607671	Weak
1	2623972	2625530	1559	6529.6	2624961	2624908	Strong
1	2628160	2628498	339	551.922	2628329	2628376	Weak
1	2662704	2665889	3186	19976.4	2664872	2664547	Strong
1	2689657	2690229	573	988.412	2689969	2690013	Weak
1	2718279	2718738	460	616.819	2718526	2718495	Weak
1	2760755	2761789	1035	1462.18	2761475	2761302	Weak
1	2812699	2813672	974	1790.61	2813206	2813107	Weak
1	2871127	2873000	1874	20266	2871810	2871982	Strong
1	2874309	2877087	2779	6382.11	2874839	2875168	Strong
1	2882072	2882195	124	401.745	2882128	2882128	Weak
1	2892278	2894025	1748	8928.34	2893388	2893145	Strong
1	2910236	2911724	1489	2749.32	2911343	2911244	Weak
1	2921065	2921704	640	991.589	2921382	2921373	Weak
1	2922666	2923417	752	2302.98	2923050	2923057	Weak
1	2924626	2925709	1084	2000.02	2925095	2925123	Weak
1	2970607	2971375	769	1889.63	2970978	2970960	Weak
1	2972025	2972976	952	1555.07	2972387	2972412	Weak
1	2974325	2976398	2074	7649.74	2975056	2975098	Strong
1	2979403	2979780	378	615.614	2979590	2979574	Weak
1	3030583	3034759	4177	34136.3	3031914	3032866	Strong
1	3051325	3052759	1435	2433.58	3051811	3051891	Weak
1	3060213	3061365	1153	1626.12	3061070	3060869	Weak
1	3076137	3077334	1198	1472.13	3077103	3076874	Weak
1	3116793	3117503	711	1322.34	3117115	3117114	Weak
1	3138424	3139254	831	1525.23	3138786	3138796	Weak
1	3143405	3143968	564	1046.11	3143672	3143688	Weak
1	3149801	3150915	1115	3434.73	3150344	3150337	Weak
1	3157448	3160515	3068	66279.9	3159308	3159258	Strong
1	3179986	3180843	858	1263.24	3180382	3180427	Weak
1	3184480	3184653	174	307.74	3184563	3184588	Weak
1	3208686	3209334	649	997.263	3209016	3209041	Weak
1	3238348	3239090	743	1623.19	3238669	3238646	Weak
1	3241549	3242217	669	1322.33	3241894	3241951	Weak
1	3272667	3274254	1588	13233.2	3273214	3273198	Strong
1	3300478	3303295	2818	39647.2	3301918	3301912	Strong
1	3405286	3406224	939	2449.86	3405760	3405741	Weak
1	3442711	3444049	1339	1851.95	3443633	3443399	Weak
1	3447949	3448484	536	941.131	3448217	3448193	Weak
1	3456244	3456717	474	656.454	3456496	3456452	Weak
1	3462032	3462450	419	627.683	3462235	3462245	Weak
1	3477774	3478276	503	716.69	3478023	3478059	Weak
1	3548518	3551286	2769	32278.6	3549925	3549879	Strong
1	3573826	3574563	738	1183.86	3574198	3574215	Weak
1	3575415	3579831	4417	22206.7	3578978	3578613	Strong
1	3663122	3663685	564	816.851	3663438	3663488	Weak
1	3665573	3665678	106	209.127	3665612	3665646	Weak
1	3746787	3749168	2382	14911.9	3748042	3748048	Strong
1	3811574	3812472	899	2916.03	3811972	3811939	Weak
1	3846454	3847333	880	1440.42	3846795	3846829	Weak
1	3875563	3877930	2368	13649.1	3877260	3877217	Strong
1	3878777	3881770	2994	6128.81	3879739	3879919	Strong
1	3891633	3892032	400	582.19	3891832	3891860	Weak
1	3919797	3920935	1139	4787.23	3920393	3920393	Strong
1	3929657	3930471	815	2081.73	3930073	3930112	Weak
1	3934586	3935488	903	1682.72	3935056	3935072	Weak
1	3938124	3940163	2040	20359.8	3939604	3939208	Strong
1	3958974	3959510	537	903.679	3959238	3959261	Weak
1	3990851	3994732	3882	27283.4	3992354	3992542	Strong
1	4009702	4013867	4166	18684.3	4010550	4011376	Strong
1	4047266	4049732	2467	5355.54	4047761	4047908	Strong
1	4056421	4057204	784	2219.99	4056832	4056852	Weak
1	4121609	4122059	451	759.613	4121837	4121837	Weak
1	4136009	4136866	858	1120.76	4136314	4136410	Weak
1	4138677	4140576	1900	7258.57	4139303	4139398	Strong
1	4153394	4153939	546	695.282	4153663	4153699	Weak
1	4177876	4184894	7019	50816.3	4182378	4182348	Strong
1	4195314	4197339	2026	4291.86	4195924	4196179	Weak
1	4230664	4230851	188	458.06	4230764	4230737	Weak
1	4234374	4235433	1060	1696.09	4234763	4234832	Weak
1	4239041	4240171	1131	2622.35	4239702	4239649	Weak
1	4241008	4241115	108	179.067	4241063	4241056	Weak
1	4243040	4244287	1248	5426.56	4243650	4243631	Strong
1	4247792	4248009	218	349.243	4247893	4247927	Weak
1	4326387	4326644	258	484.061	4326515	4326542	Weak
1	4360267	4363022	2756	39399.4	4361635	4361637	Strong
1	4434866	4437744	2879	20087	4437010	4436664	Strong
1	4438836	4439319	484	619.321	4439039	4439065	Weak
1	4455395	4458823	3429	13324.4	4456598	4456856	Strong
1	4471565	4473033	1469	4358.7	4472439	4472331	Weak
1	4514799	4515318	520	749.936	4515049	4515021	Weak
1	4531037	4531551	515	951.646	4531294	4531263	Weak
1	4540808	4541170	363	498.909	4540999	4540986	Weak
1	4562770	4563701	932	2391.82	4563211	4563187	Weak
1	4605354	4606437	1084	2368.03	4605908	4605854	Weak
1	4618425	4619372	948	1838.03	4618928	4618925	Weak
1	4648311	4649020	710	1016.37	4648719	4648703	Weak
1	4658565	4658634	70	181.933	4658600	4658577	Weak
1	4673314	4676215	2902	13598.3	4675577	4675039	Strong
1	4720947	4723496	2550	36632.8	4722709	4722414	Strong
1	4773328	4774014	687	1690.44	4773679	4773692	Weak
1	4787095	4789667	2573	17788.1	4788610	4788334	Strong
1	4791258	4791798	541	834.991	4791542	4791591	Weak
1	4820462	4821291	830	2265.85	4820892	4820942	Weak
1	4838662	4839103	442	645.212	4838886	4838866	Weak
1	4843495	4844921	1427	4223.59	4844048	4844116	Weak
1	4845837	4846609	773	2249.15	4846268	4846300	Weak
1	4869543	4870196	654	1118.23	4869873	4869838	Weak
1	4873081	4874790	1710	9192.74	4874046	4874004	Strong
1	4880585	4882897	2313	7270.6	4881478	4881803	Strong
1	4890045	4890201	157	338.159	4890123	4890146	Weak
1	4910531	4912414	1884	47388.5	4911406	4911403	Strong
1	4960799	4961044	246	488.268	4960914	4960946	Weak
1	5058555	5059414	860	1809.42	5059017	5059017	Weak
1	5063363	5064697	1335	1764.23	5063813	5063922	Weak
1	5066275	5067485	1211	1993.46	5066684	5066805	Weak
1	5069456	5070338	883	1532.12	5069786	5069750	Weak
1	5145557	5146509	953	2685.96	5146028	5146024	Weak
1	5156100	5160005	3906	10889.9	5159458	5158392	Strong
1	5171789	5172431	643	1254.72	5172101	5172100	Weak
1	5174554	5178649	4096	20592.1	5178061	5177369	Strong
1	5186950	5187707	758	1590.1	5187360	5187358	Weak
1	5266912	5271108	4197	25206.1	5269992	5269916	Strong
1	5272326	5273323	998	2413.79	5272908	5272956	Weak
1	5278662	5279401	740	1640.08	5279044	5279038	Weak
1	5298113	5298846	734	1732.27	5298467	5298433	Weak
1	5308930	5311620	2691	8754.83	5310175	5310324	Strong
1	5319753	5321640	1888	4474.75	5320700	5320674	Weak
1	5328349	5329137	789	1503.07	5328756	5328741	Weak
1	5366507	5366724	218	416.696	5366615	5366613	Weak
1	5402186	5402598	413	562.191	5402389	5402412	Weak
1	5413156	5415298	2143	12441.4	5414427	5414387	Strong
1	5425929	5429094	3166	27562.1	5427745	5427693	Strong
1	5434750	5435626	877	1857.6	5435271	5435262	Weak
1	5441652	5443392	1741	9022.75	5442533	5442507	Strong
1	5447496	5449717	2222	6780.05	5449025	5448861	Strong
1	5459646	5460396	751	1546.93	5460031	5460030	Weak
1	5465596	5466594	999	1415.24	5466128	5466112	Weak
1	5468870	5469834	965	3284.75	5469349	5469341	Weak
1	5474694	5476249	1556	5391.07	5475382	5475419	Strong
1	5479395	5479946	552	826.884	5479698	5479743	Weak
1	5504625	5505684	1060	3415.73	5505089	5505074	Weak
2	80332	81185	854	2005.94	80794	80784	Weak
2	127391	129657	2267	9420.8	128442	128463	Strong
2	130382	134293	3912	14300.2	133707	133056	Strong
2	155086	157173	2088	12977.9	155669	155729	Strong
2	162485	162803	319	507.288	162634	162622	Weak
2	163327	163634	308	440.589	163481	163449	Weak
2	164956	166249	1294	3343.85	165820	165660	Weak
2	168778	169484	707	976.224	169154	169180	Weak
2	174218	175153	936	2405.99	174652	174616	Weak
2	199254	201967	2714	4713.35	200355	200350	Strong
2	203839	204083	245	422.103	203957	203913	Weak
2	206292	206515	224	396.466	206406	206377	Weak
2	228004	231402	3399	8090.8	228626	229239	Strong
2	291846	293295	1450	4755.83	292872	292619	Strong
2	294333	295015	683	1529.16	294659	294659	Weak
2	309889	310549	661	1025.38	310207	310206	Weak
2	317922	318495	574	1057.26	318210	318190	Weak
2	326734	327511	778	1864.72	327095	327090	Weak
2	330224	333572	3349	22788.5	332413	332068	Strong
2	352943	354983	2041	7045.02	354421	354394	Strong
2	357228	360771	3544	8776.39	358686	358814	Strong
2	361352	361575	224	430.478	361466	361461	Weak
2	376972	377605	634	1063.71	377282	377272	Weak
2	400861	401007	147	305.17	400937	400896	Weak
2	408138	409160	1023	2009.63	408592	408639	Weak
2	412288	413358	1071	3973.18	412818	412866	Weak
2	446846	447637	792	987.107	447077	447257	Weak
2	464555	465844	1290	4617.14	465342	465324	Strong
2	503709	505498	1790	11164.7	504738	504561	Strong
2	522575	525926	3352	35094.4	523857	524007	Strong
2	574211	578884	4674	13659.1	577801	577601	Strong
2	580479	580759	281	431.828	580619	580594	Weak
2	606393	606749	357	534.862	606562	606567	Weak
2	627161	628546	1386	9440.4	627866	627854	Strong
2	674708	675481	774	1459.45	675070	675076	Weak
2	714485	714824	340	575.601	714650	714608	Weak
2	717492	720515	3024	7586.9	719073	718994	Strong
2	738539	739711	1173	3508.65	739009	739022	Weak
2	819491	820089	599	1010.4	819795	819779	Weak
2	835364	837136	1773	9175.9	836399	836203	Strong
2	840492	841731	1240	2343.56	841288	841268	Weak
2	888405	892651	4247	34425.7	889786	890075	Strong
2	934182	934617	436	591.84	934417	934409	Weak
2	948212	951241	3030	40014.9	949604	949854	Strong
2	962837	966279	3443	15596.4	963740	964396	Strong
2	1034412	1034835	424	637.831	1034619	1034566	Weak
2	1045573	1047790	2218	5792	1046839	1046805	Strong
2	1057032	1058271	1240	3167.05	1057481	1057580	Weak
2	1080250	1081682	1433	4635.12	1081151	1081087	Strong
2	1135507	1136649	1143	2985.16	1136129	1136114	Weak
2	1146887	1151387	4501	23576.6	1149427	1149747	Strong
2	1175874	1176385	512	789.585	1176134	1176141	Weak
2	1202298	1203225	928	2063.61	1202807	1202791	Weak
2	1213591	1214299	709	1055.69	1213995	1214014	Weak
2	1215623	1216824	1202	4538.06	1216216	1216283	Weak
2	1226570	1227206	637	1268.38	1226876	1226885	Weak
2	1263795	1269614	5820	36835.6	1267584	1267337	Strong
2	1307065	1307724	660	1144.9	1307393	1307406	Weak
2	1318251	1318576	326	470.714	1318421	1318454	Weak
2	1349504	1350237	734	1215.51	1349879	1349899	Weak
2	1354683	1355295	613	980.998	1355025	1355024	Weak
2	1358474	1358811	338	523.404	1358646	1358672	Weak
2	1362180	1364373	2194	20683.5	1363621	1363548	Strong
2	1454252	1457149	2898	16235.8	1455770	1455806	Strong
2	1513853	1514157	305	583.321	1514011	1514013	Weak
2	1532366	1532646	281	425.99	1532509	1532518	Weak
2	1545070	1547110	2041	12569.7	1545848	1546198	Strong
2	1553672	1555981	2310	6272.66	1554787	1554786	Strong
2	1572439	1574387	1949	31988.8	1573682	1573634	Strong
2	1655284	1656107	824	2253.75	1655711	1655711	Weak
2	1678600	1681017	2418	7332.81	1679678	1679762	Strong
2	1685269	1688730	3462	14036.5	1687534	1687375	Strong
2	1720572	1722510	1939	8190.06	1721122	1721344	Strong
2	1748483	1752622	4140	11609.2	1748974	1750767	Strong
2	1776588	1777281	694	1454.23	1776916	1776937	Weak
2	1793514	1793770	257	435.204	1793646	1793698	Weak
2	1887303	1889737	2435	27764.6	1888824	1888819	Strong
2	1941581	1942247	667	959.174	1941909	1941882	Weak
2	1950520	1953131	2612	35781.4	1951741	1951760	Strong
2	1972879	1973326	448	649.171	1973103	1973088	Weak
2	1975647	1976033	387	664.169	1975834	1975832	Weak
2	1981919	1982498	580	1048.53	1982202	1982177	Weak
2	2021412	2023191	1780	4092.81	2022353	2022365	Weak
2	2092319	2092736	418	674.528	2092534	2092550	Weak
2	2099810	2100230	421	666.341	2100022	2099987	Weak
2	2113584	2114220	637	1441.08	2113922	2113948	Weak
2	2184996	2186273	1278	1787.14	2185306	2185447	Weak
2	2198228	2201536	3309	7030.52	2200677	2200271	Strong
2	2245282	2246137	856	1689.67	2245714	2245711	Weak
2	2265247	2265474	228	370.21	2265360	2265358	Weak
2	2266153	2266392	240	319.654	2266280	2266318	Weak
2	2313061	2313477	417	721.877	2313261	2313238	Weak
2	2328396	2329602	1207	3879.65	2328898	2328923	Weak
2	2337813	2340832	3020	31488.7	2338333	2339040	Strong
2	2373589	2373911	323	444.364	2373756	2373739	Weak
2	2377425	2377829	405	643.89	2377634	2377622	Weak
2	2384701	2385404	704	1150.07	2385041	2385056	Weak
2	2405659	2406041	383	562.648	2405855	2405901	Weak
2	2411433	2413330	1898	3156.89	2412960	2412592	Weak
2	2426391	2426568	178	396.27	2426480	2426486	Weak
2	2434246	2435375	1130	1873.21	2434700	2434758	Weak
2	2451302	2452139	838	1853.42	2451705	2451694	Weak
2	2462531	2463205	675	1007.87	2462922	2462937	Weak
2	2470088	2473305	3218	9256.77	2472437	2472094	Strong
2	2484899	2486517	1619	2855.01	2485316	2485502	Weak
2	2497768	2497981	214	330.011	2497877	2497856	Weak
2	2503862	2504053	192	402.4	2503956	2503931	Weak
2	2526288	2530286	3999	37565.7	2527989	2527948	Strong
2	2532183	2533091	909	3164.97	2532625	2532634	Weak
2	2552941	2553899	959	2035.43	2553455	2553486	Weak
2	2575264	2576254	991	2594.8	2575779	2575781	Weak
2	2580297	2581176	880	1563.99	2580797	2580745	Weak
2	2584332	2586432	2101	10535.8	2585279	2585335	Strong
2	2590494	2592202	1709	8966.16	2591000	2591212	Strong
2	2600485	2602597	2113	10526.9	2601108	2601473	Strong
2	2610849	2611420	572	883.344	2611127	2611156	Weak
2	2625957	2627303	1347	4858.68	2626529	2626568	Strong
2	2631935	2632093	159	219.558	2632014	2632047	Weak
2	2646521	2646893	373	581.043	2646702	2646675	Weak
2	2660113	2662895	2783	14636.4	2661579	2661628	Strong
2	2701871	2705028	3158	17344.3	2704161	2704018	Strong
2	2805693	2808073	2381	12904.7	2806742	2806883	Strong
2	2826247	2828536	2290	5907.11	2826667	2827219	Strong
2	2839543	2840577	1035	4194.13	2839993	2840018	Weak
2	2885543	2887432	1890	7461.01	2886809	2886626	Strong
2	2894896	2895848	953	1524.1	2895520	2895411	Weak
2	2899385	2902957	3573	14069.5	2899986	2900427	Strong
2	2941049	2941788	740	1631.24	2941425	2941447	Weak
2	2947309	2949207	1899	12792.2	2948509	2948363	Strong
2	2969360	2971470	2111	6910.22	2970034	2970109	Strong
2	3008185	3012511	4327	48607.2	3009051	3010421	Strong
2	3015121	3015389	269	413.668	3015255	3015277	Weak
2	3020061	3020601	541	850.234	3020331	3020325	Weak
2	3022054	3022573	520	751.793	3022337	3022280	Weak
2	3068642	3070622	1981	6906.54	3069861	3069756	Strong
2	3137134	3137979	846	1810.68	3137560	3137556	Weak
2	3154462	3157187	2726	19028.5	3156150	3156099	Strong
2	3165350	3167059	1710	8194.73	3166351	3166273	Strong
2	3171848	3172309	462	675.501	3172077	3172124	Weak
2	3230678	3231647	970	1778.54	3231232	3231205	Weak
2	3237075	3238180	1106	1438.15	3237906	3237657	Weak
2	3241933	3243432	1500	2797.78	3242997	3242833	Weak
2	3275582	3275818	237	480.053	3275705	3275684	Weak
2	3323512	3324037	526	744.957	3323770	3323760	Weak
2	3326254	3327004	751	1568.13	3326609	3326628	Weak
2	3359951	3360399	449	781.965	3360173	3360153	Weak
2	3378727	3381437	2711	8431.99	3380783	3380484	Strong
2	3393073	3393851	779	2463.84	3393462	3393481	Weak
2	3407742	3410276	2535	24466.4	3408814	3408840	Strong
2	3412898	3413273	376	649.881	3413088	3413068	Weak
2	3443025	3443168	144	278.863	3443098	3443054	Weak
2	3443816	3444940	1125	2426.74	3444306	3444293	Weak
2	3467540	3468920	1381	4418.89	3468226	3468206	Weak
2	3486770	3489129	2360	12475	3487364	3487870	Strong
2	3497308	3497783	476	678.963	3497572	3497595	Weak
2	3507366	3508323	958	2919.15	3507843	3507831	Weak
2	3512586	3514614	2029	3148.05	3514268	3513706	Weak
2	3529443	3532729	3287	19635.5	3531161	3531144	Strong
2	3572747	3575855	3109	9645.13	3575326	3574883	Strong
2	3606036	3607539	1504	3416.31	3607160	3607132	Weak
2	3622951	3626287	3337	16899.2	3625315	3625012	Strong
2	3628801	3630017	1217	5169.16	3629358	3629347	Strong
2	3630831	3634126	3296	10702.6	3632403	3632330	Strong
2	3641923	3643086	1164	9600.64	3642475	3642428	Strong
2	3697172	3698419	1248	3891.99	3697816	3697834	Weak
2	3701349	3703278	1930	10674.2	3702214	3702241	Strong
2	3721208	3721586	379	553.933	3721416	3721441	Weak
2	3828734	3829627	894	4178.96	3829218	3829239	Weak
2	3858553	3862804	4252	16201.1	3861221	3860977	Strong
2	3933027	3934823	1797	3536.94	3933412	3933678	Weak
2	3939225	3940984	1760	11058	3939951	3939965	Strong
2	3941570	3941881	312	555.849	3941727	3941698	Weak
2	3944150	3944549	400	635.421	3944360	3944378	Weak
2	3979817	3983781	3965	63928.5	3980814	3981267	Strong
2	4032764	4033913	1150	1788.97	4033214	4033357	Weak
2	4047718	4048130	413	767.441	4047927	4047941	Weak
2	4048860	4049087	228	412.618	4048973	4049009	Weak
2	4074626	4075145	520	915.93	4074880	4074841	Weak
2	4077830	4078448	619	900.672	4078158	4078190	Weak
2	4080950	4082913	1964	7274.38	4081602	4081724	Strong
2	4103731	4104681	951	2382.28	4104275	4104323	Weak
2	4105511	4110352	4842	25092.5	4109377	4108758	Strong
2	4159957	4160533	577	848.988	4160266	4160274	Weak
2	4184765	4184880	116	373.002	4184829	4184810	Weak
2	4189108	4189878	771	2063.78	4189496	4189532	Weak
2	4242805	4243805	1001	2705.91	4243210	4243170	Weak
2	4249501	4250386	886	2196.61	4249927	4249971	Weak
2	4251488	4251767	280	511.68	4251625	4251635	Weak
2	4252442	4253226	785	2127.9	4252831	4252793	Weak
2	4255041	4256276	1236	2815.12	4255669	4255668	Weak
2	4259431	4260142	712	1399.08	4259814	4259817	Weak
2	4263973	4265912	1940	12827	4265130	4265054	Strong
2	4288744	4289123	380	572.974	4288929	4288913	Weak
2	4292110	4293007	898	2753.25	4292587	4292573	Weak
2	4296024	4298053	2030	12453.7	4297224	4297246	Strong
2	4299810	4300701	892	1106.13	4300059	4300177	Weak
2	4302521	4303255	735	1602.9	4302901	4302918	Weak
2	4351396	4351913	518	837.919	4351660	4351692	Weak
2	4366994	4368353	1360	3808.14	4367718	4367667	Weak
2	4375074	4375437	364	494.892	4375246	4375243	Weak
2	4441882	4444391	2510	11128.1	4443725	4443476	Strong
2	4445968	4446289	322	578.864	4446129	4446136	Weak
2	4446951	4447419	469	793.278	4447186	4447174	Weak
2	4460266	4460906	641	1079.82	4460577	4460584	Weak
2	4466207	4466858	652	1353.22	4466539	4466551	Weak
2	4470800	4472928	2129	12101.8	4472041	4472002	Strong
2	4475507	4476118	612	1123.33	4475825	4475913	Weak
3	48182	49375	1194	3679.26	48705	48721	Weak
3	54146	55939	1794	5962.25	55289	55158	Strong
3	58850	59376	527	775.189	59112	59159	Weak
3	75502	78093	2592	10164.9	77352	77278	Strong
3	118835	120471	1637	9102.68	119394	119430	Strong
3	152828	153454	627	1293.01	153128	153104	Weak
3	154013	154283	271	295.045	154150	154188	Weak
3	161896	163048	1153	3897.65	162442	162471	Weak
3	172937	173384	448	666.436	173162	173184	Weak
3	202122	203211	1090	1818.52	202465	202521	Weak
3	207657	211802	4146	20717.3	209699	209715	Strong
3	234919	237341	2423	7120.35	235450	235721	Strong
3	241500	243456	1957	3355.18	241964	242303	Weak
3	245386	246264	879	1685.51	245827	245796	Weak
3	264893	265679	787	1755.91	265254	265227	Weak
3	269440	269653	214	330.161	269542	269606	Weak
3	276642	278765	2124	30499.9	277627	277682	Strong
3	319170	319802	633	1025.02	319519	319546	Weak
3	346608	349703	3096	10893.7	347781	347976	Strong
3	351828	353191	1364	4110.68	352614	352554	Weak
3	423042	423800	759	1787.67	423398	423390	Weak
3	429783	430601	819	1652.46	430162	430168	Weak
3	458960	460151	1192	2583.69	459390	459414	Weak
3	472010	473035	1026	2030.51	472401	472407	Weak
3	486492	486757	266	442.656	486626	486650	Weak
3	523273	523929	657	1191.05	523618	523636	Weak
3	563326	565506	2181	7441.83	564920	564568	Strong
3	567130	569197	2068	25870.2	568214	568189	Strong
3	624496	625340	845	2783.21	624920	624933	Weak
3	626248	628435	2188	4238.42	628003	627994	Weak
3	629818	630443	626	1321.37	630128	630095	Weak
3	631035	632604	1570	8238.24	631911	631892	Strong
3	706588	708611	2024	7500.99	707866	707666	Strong
3	716191	717465	1275	7277.59	716948	716959	Strong
3	720811	721699	889	1191.03	720994	721255	Weak
3	727696	729656	1961	16915.4	728461	728500	Strong
3	730462	731813	1352	8341.4	731212	731165	Strong
3	739900	741827	1928	17588.8	740600	740667	Strong
3	762015	765676	3662	11796.5	765159	764037	Strong
3	772572	773485	914	2333.24	773060	773064	Weak
3	791843	792690	848	1226.55	792204	792216	Weak
3	808816	811593	2778	8278.39	810146	810256	Strong
3	822823	823647	825	2270.22	823223	823233	Weak
3	824552	825150	599	1036.14	824839	824830	Weak
3	862082	862294	213	439.155	862183	862183	Weak
3	866939	867747	809	1542.9	867348	867339	Weak
3	896533	897014	482	845.381	896771	896757	Weak
3	905821	906092	272	393.752	905948	905949	Weak
3	936140	936369	230	368.019	936264	936278	Weak
3	939706	939987	282	440.243	939891	939881	Weak
3	954964	955411	448	747.448	955180	955201	Weak
3	956940	958786	1847	18862.8	957912	957898	Strong
3	964680	968147	3468	7755.39	965293	965555	Strong
3	969162	971001	1840	6547.87	970166	970153	Strong
3	1037628	1038648	1021	1681.6	1038015	1038057	Weak
3	1046999	1047481	483	685.932	1047257	1047239	Weak
3	1157238	1157706	469	688.785	1157484	1157545	Weak
3	1196514	1198009	1496	1901.4	1196778	1197325	Weak
3	1253535	1254028	494	791.657	1253787	1253784	Weak
3	1265743	1266943	1201	2180.15	1266205	1266280	Weak
3	1300940	1301513	574	1009.11	1301235	1301258	Weak
3	1315942	1318589	2648	68943.5	1317454	1317500	Strong
3	1394532	1397451	2920	12992.4	1396264	1396081	Strong
3	1398247	1399446	1200	2197.27	1399129	1398951	Weak
3	1402025	1402294	270	446.384	1402160	1402167	Weak
3	1420905	1421364	460	783.953	1421136	1421169	Weak
3	1430925	1431318	394	655.631	1431111	1431111	Weak
3	1444114	1444730	617	1114.52	1444414	1444364	Weak
3	1448303	1449184	882	1749.33	1448737	1448735	Weak
3	1451299	1451950	652	1128.27	1451610	1451584	Weak
3	1485736	1486194	459	729.64	1485964	1485961	Weak
3	1501081	1501822	742	1230.62	1501468	1501495	Weak
3	1529581	1530136	556	1123.85	1529859	1529855	Weak
3	1545871	1548442	2572	9600.24	1547737	1547300	Strong
3	1559255	1560357	1103	3983.39	1559833	1559807	Weak
3	1583774	1584657	884	1655.1	1584230	1584250	Weak
3	1588618	1591803	3186	19813	1589468	1589611	Strong
3	1593651	1594721	1071	2539.68	1594083	1594103	Weak
3	1607807	1608880	1074	7448.85	1608332	1608359	Strong
3	1634527	1635293	767	1794.9	1634889	1634880	Weak
3	1640505	1641414	910	1605.19	1640911	1640868	Weak
3	1650439	1650668	230	321.836	1650552	1650511	Weak
3	1652348	1653729	1382	5927.53	1653023	1653017	Strong
3	1672119	1674320	2202	4507.64	1672942	1673100	Weak
3	1676659	1678032	1374	5605.07	1677321	1677290	Strong
3	1690139	1690960	822	1148.61	1690573	1690520	Weak
3	1703318	1703483	166	290.732	1703400	1703411	Weak
3	1704154	1704687	534	831.186	1704426	1704442	Weak
3	1714062	1714310	249	343.078	1714185	1714187	Weak
3	1721264	1723838	2575	12436.8	1722943	1722844	Strong
3	1732179	1732828	650	1399.01	1732510	1732477	Weak
3	1758435	1758566	132	209.098	1758501	1758511	Weak
3	1836920	1840202	3283	43092.2	1838031	1838126	Strong
3	1858937	1859434	498	705.037	1859189	1859177	Weak
3	1867068	1867517	450	609.93	1867306	1867292	Weak
3	1917439	1919306	1868	11631.1	1918688	1918697	Strong
3	1935320	1936011	692	956.283	1935751	1935786	Weak
3	2022894	2024649	1756	4829.33	2024037	2023929	Strong
3	2039882	2041238	1357	2032.61	2040172	2040496	Weak
3	2043954	2045924	1971	10647.7	2045083	2045012	Strong
3	2067370	2069495	2126	7335.93	2068349	2068465	Strong
3	2075308	2077282	1975	19647.4	2076124	2076188	Strong
3	2081322	2081857	536	644.765	2081624	2081570	Weak
3	2107236	2108489	1254	3083.21	2107945	2107897	Weak
3	2179003	2179844	842	1519.33	2179493	2179431	Weak
3	2191003	2191241	239	307.476	2191122	2191215	Weak
3	2205776	2206533	758	1570.22	2206174	2206140	Weak
3	2217213	2218923	1711	7184.59	2218111	2218080	Strong
3	2220697	2221115	419	699.562	2220894	2220908	Weak
3	2230545	2230660	116	185.437	2230605	2230559	Weak
3	2241616	2242799	1184	3283.98	2242210	2242210	Weak
3	2267738	2268581	844	2602.4	2268164	2268139	Weak
3	2276408	2277189	782	1555.32	2276811	2276816	Weak
3	2280167	2281558	1392	3111.55	2280667	2280769	Weak
3	2286612	2288012	1401	10933.2	2287138	2287095	Strong
3	2289145	2289993	849	2161.61	2289532	2289524	Weak
3	2291984	2293701	1718	5941.15	2293242	2293156	Strong
3	2295762	2297640	1879	10361.8	2297035	2296756	Strong
3	2301805	2302441	637	1278.52	2302129	2302127	Weak
3	2308700	2308893	194	261.771	2308799	2308758	Weak
3	2309563	2312072	2510	10409.7	2310868	2310982	Strong
3	2334819	2336748	1930	9509.13	2335738	2335764	Strong
3	2351844	2353138	1295	14923.1	2352496	2352512	Strong
3	2355922	2357859	1938	5660.85	2357116	2357037	Strong
3	2361758	2363240	1483	4799.42	2362524	2362543	Strong
3	2370348	2370864	517	855.075	2370614	2370672	Weak
3	2379987	2382141	2155	8495.74	2380519	2380614	Strong
3	2417718	2418152	435	699.38	2417927	2417929	Weak
3	2422292	2424163	1872	5619.95	2422795	2423031	Strong
3	2444983	2445381	399	610.642	2445198	2445210	Weak
† Oligo count is the raw read count including fractionally assigned (imputed) multi-mappers.
‡ Median position is the point in the hotspot that divides the oligo count in half.
