# Supplementary material for: Evolutionarily diverse determinants of meiotic DNA break and recombination landscapes across the genome
Source: HighWire-hosted journal article supplement (doi:10.1101/gr.172122.114), 2014-07-14
Supplement: Supplemental_Table_4.xlsx [file Supplemental_Table_4.xlsx]

## Sheet: Supplementary table S4
Figure S3B ID	Chr	Left marker	Right marker	Left coord.	Right coord.	width (kb)	cM	Total oligos	Hot oligos	Cold oligos	Interval type	Ref.
1	1	arg3	lys7	2274000	4497000	2223	355†	196788	150879	45908.7	cold	Davis et al., 2008
2	1	ura1	arg3	743570	2274000	1530.43	245†	117807	87873.9	29933.3	cold	Davis et al., 2008
3	1	mes1	arg3	1499000	2274000	775	117†	59686.9	44759.8	14927.2	cold	Davis et al., 2008
4	1	ura1	mes1	743570	1499000	755.43	91†	58120.3	43114.1	15006.2	cold	Davis et al., 2008
5	1	lys3	pro1	531509	1007572	476.063	57	31701.3	21545.3	10156	cold	Ellermeier and Smith, 2005
5	1	lys3	pro1	531509	1007572	476.063	42.5	31701.3	21545.3	10156	cold	Young et al., 2002
6	1	ura1	met5	743570	1144000	400.43	43	28116	19514.9	8601.08	cold	Davis et al., 2008
7	3	ade6-M26	arg1	1317555	1614110	296.555	68	26536.7	19586.8	6949.89	cold	Smith et al., 2003
8	1	ura1	pro1	743570	1007572	264.002	32.4	22659.6	16867.6	5792.01	cold	Young et al., 2002
8	1	ura1	pro1	743570	1007572	264.002	27	22659.6	16867.6	5792.01	cold	Ellermeier and Smith, 2005
9	1	ura1	mis6	743570	941490	197.92	22.9	13991	10156.9	3834.13	cold	Young et al., 2002
10	3	ade6 L	ade6 R	1315692	1319486	3.794	5.8*	13326.1	13294.9	31.2333	hot	Hyppa and Smith, 2010
11	1	lys3	ura1	531509	743570	212.061	25	9041.67	4677.69	4363.99	cold	Ellermeier and Smith, 2005
11	1	lys3	ura1	531509	743570	212.061	24.4	9041.67	4677.69	4363.99	cold	Hyppa and Smith, 2010
11	1	lys3	ura1	531509	743570	212.061	23.2	9041.67	4677.69	4363.99	cold	Young et al., 2002
11	1	lys3	ura1	531509	743570	212.061	20	9041.67	4677.69	4363.99	cold	Davis et al., 2008
12	1	mis6	pro1	941490	1007572	66.082	6.2	8669.04	6710.75	1958.29	hot	Young et al., 2002
13	2	lys4	his4	3507390	3.58296e+06	75.5705	15	7835.81	6809.72	1026.08	cold	Ellermeier and Smith, 2005
14	1	ade3	ura3	1331248	1386176	54.928	5.1	7505.45	6549.83	955.613	hot	Shimoda et al., 1985
15	1	ura1	rqh1	743570	834398	90.828	17.4	7313.08	5597.39	1715.69	cold	Hyppa and Smith, 2010
15	1	ura1	rqh1	743570	834398	90.828	10.8	7313.08	5597.39	1715.69	cold	Young et al., 2002
15	1	ura1	rqh1	743570	834398	90.828	9.7	7313.08	5597.39	1715.69	cold	Cromie et al., 2005
16	1	aur1	ura1	599709	743570	143.861	18	6746.61	3939.46	2807.15	cold	Young et al., 2002
17	1	rqh1	mis6	834398	941490	107.092	14.1	6677.93	4559.49	2118.44	cold	Young et al., 2002
18	1	aur1	rad15	599709	664918	65.209	9.8	5006.63	3709.4	1297.23	cold	Young et al., 2002
19	1	mbs1 L	mbs1 R	760459	765223	4.764	5	4633.23	4609.23	24.0045	hot	Cromie et al., 2005
20	1	ura2	leu2	4428000	4441000	13	2.1	4343.02	3992.96	350.055	hot	Hyppa and Smith, 2010
21	1	lys3	aur1	531509	599709	68.2	12.5	2295.06	738.226	1556.83	cold	Hyppa and Smith, 2010
21	1	lys3	aur1	531509	599709	68.2	10.7	2295.06	738.226	1556.83	cold	Young et al., 2002
22	1	mbs1 R	rqh1	765223	834398	69.175	2.2	2264.61	988.161	1276.45	hot	Cromie et al., 2005
23	1	rad15	ura1	664918	743570	78.652	5.9	1739.98	230.056	1509.93	cold	Young et al., 2002
24	1	res2-G1	ura1	686993	743570	56.577	3.4	995.693	148.29	847.403	cold	Young et al., 2002
25	1	res2-J3	ura1	687000	743570	56.57	4.3	995.687	148.29	847.397	cold	Young et al., 2002
26	1	rad15	res2	664918	686993	22.075	2.7	744.294	81.7661	662.528	cold	Young et al., 2002
27	1	ura1	mbs1 L	743570	760459	16.889	1.9	415.231	0	415.231	cold	Cromie et al., 2005
* This value was calculated based on physically determined crossover DNA fragments at 6-7 hours in meiosis.
† Nominal cM calculated as 1.6 cM/kb (based on the observed near-uniform crossover density)
