# Supplementary figures and images for: Evolutionarily diverse determinants of meiotic DNA break and recombination landscapes across the genome
Source: PubMed Central journal article supplement — Genome Res. 2014 Oct;24(10):1650–64. doi: 10.1101/gr.172122.114 (PMC4199369; doi:10.1101/gr.172122.114), 2014-10

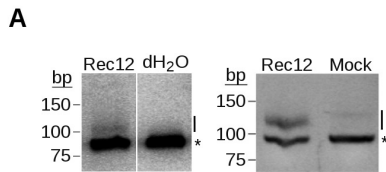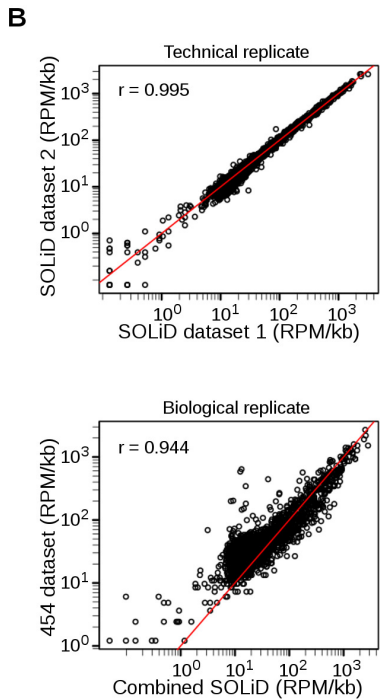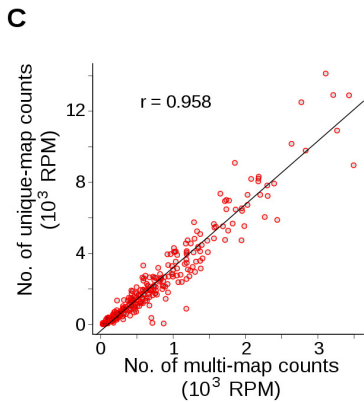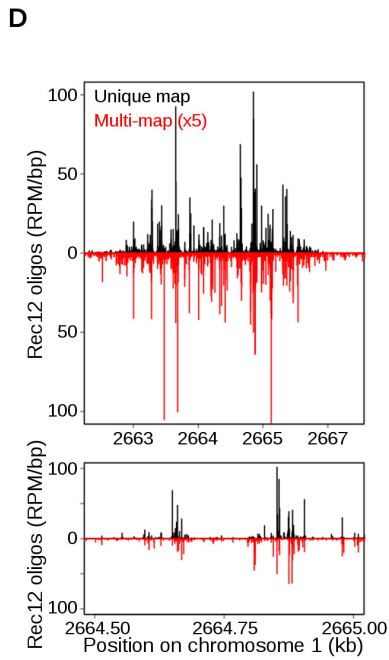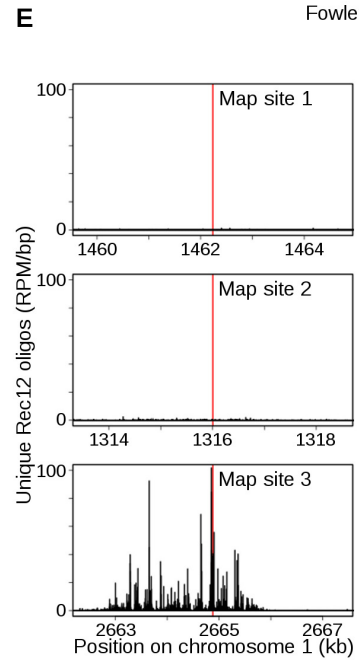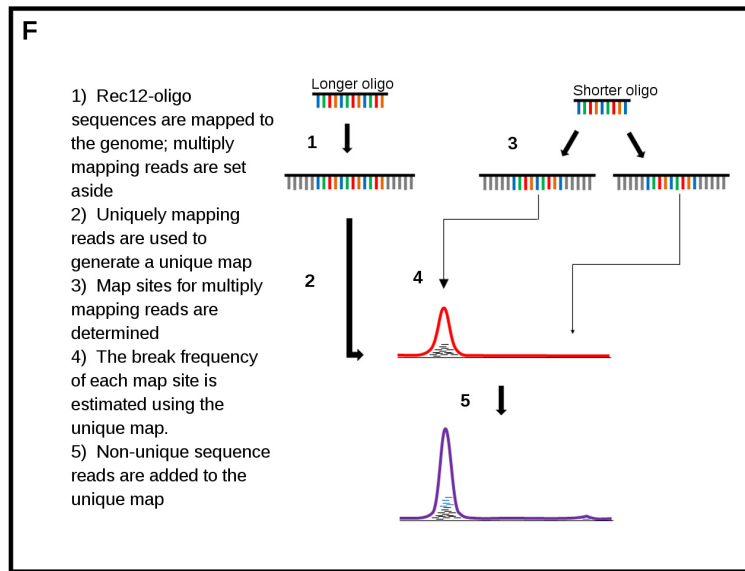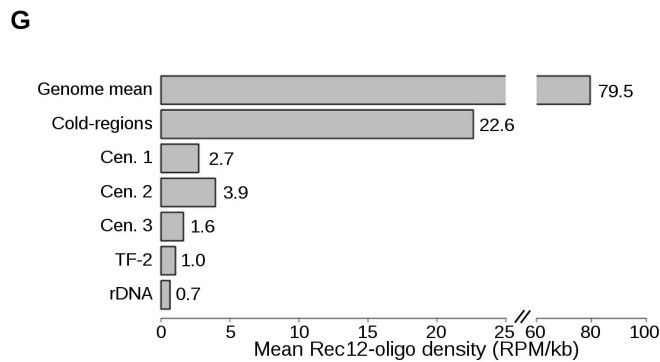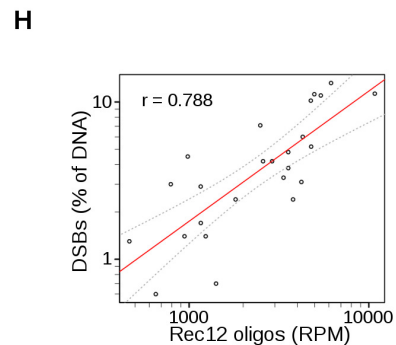

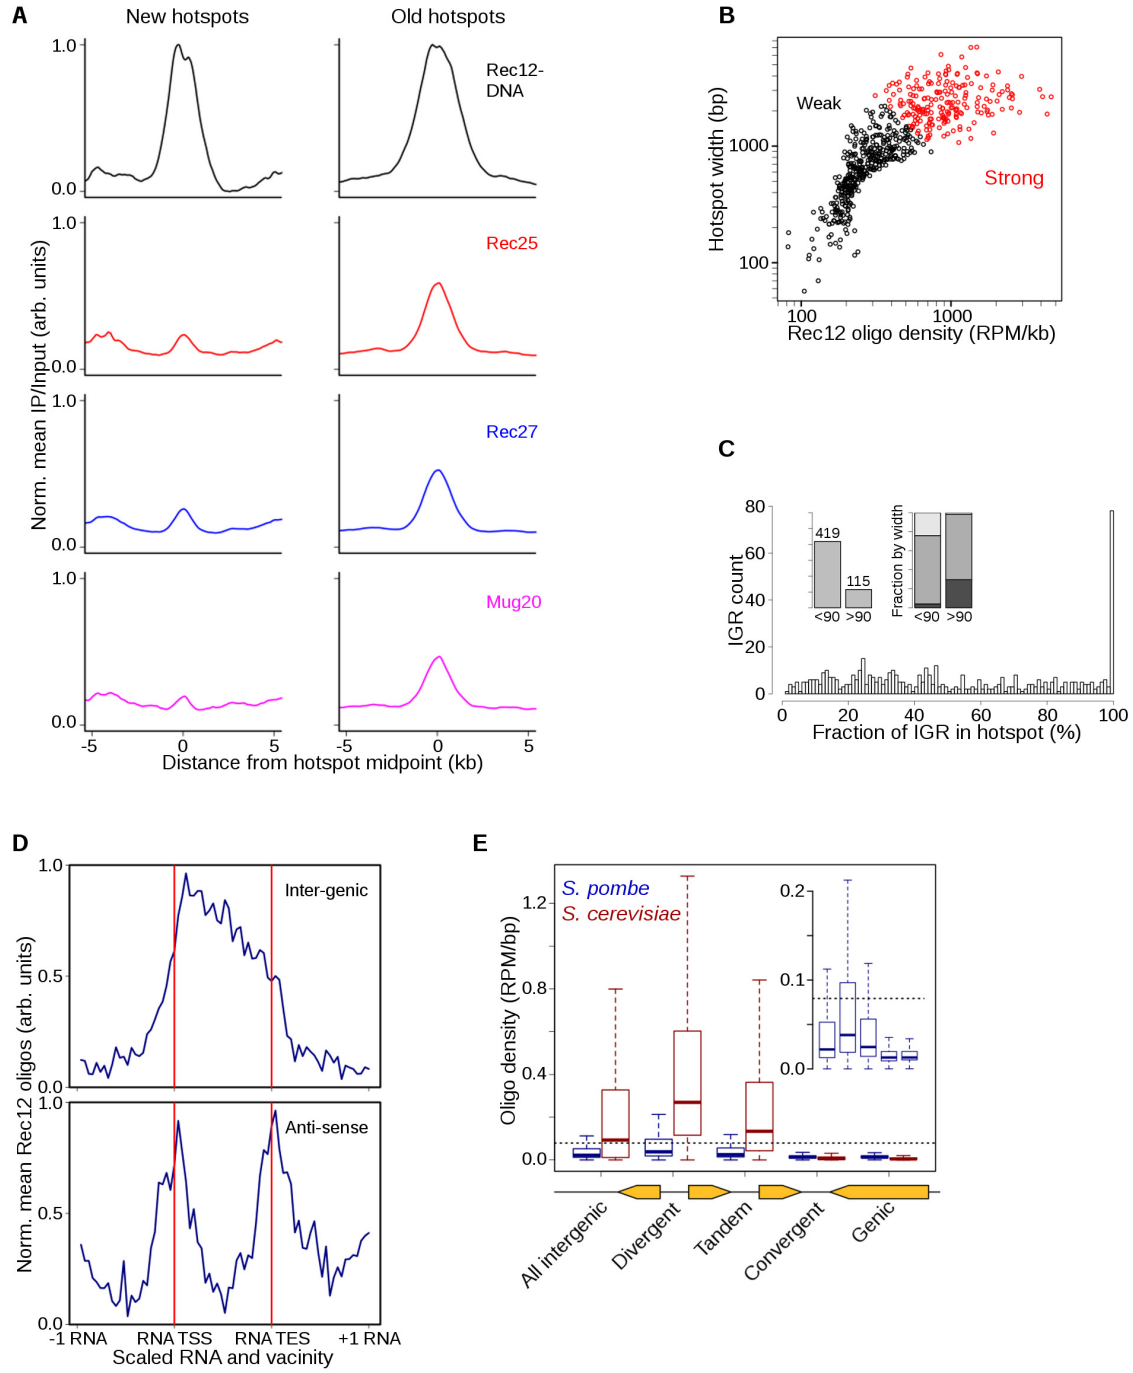

**A**

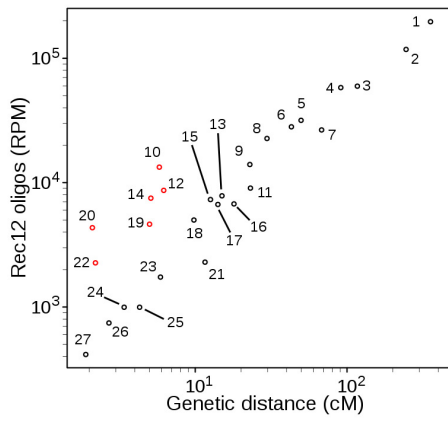

**B**

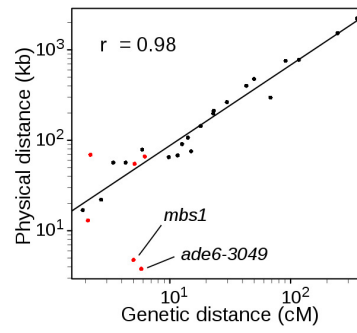

**C**

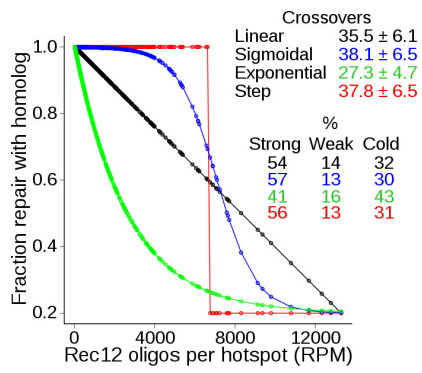

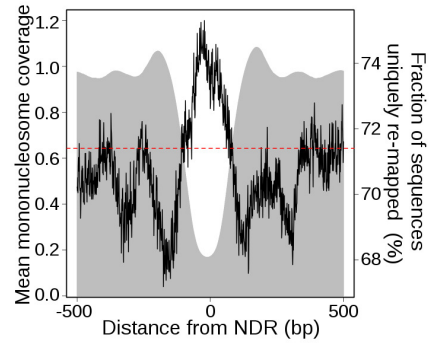

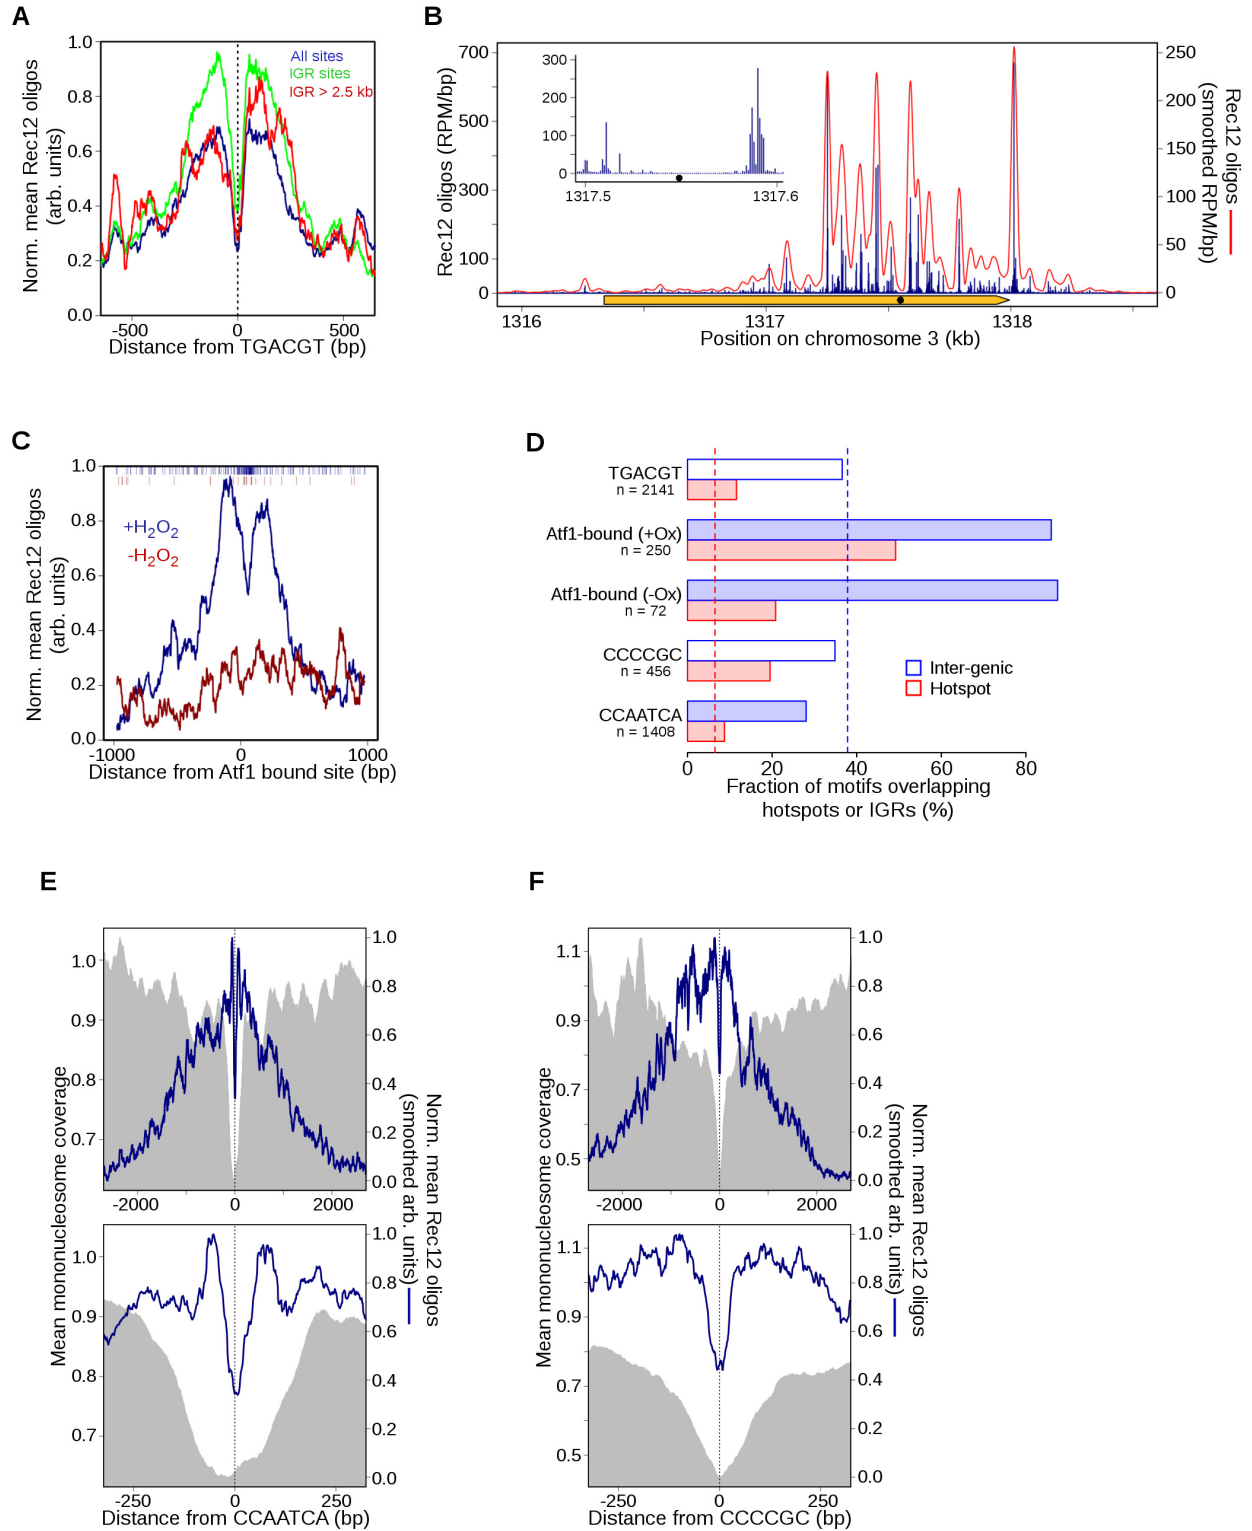

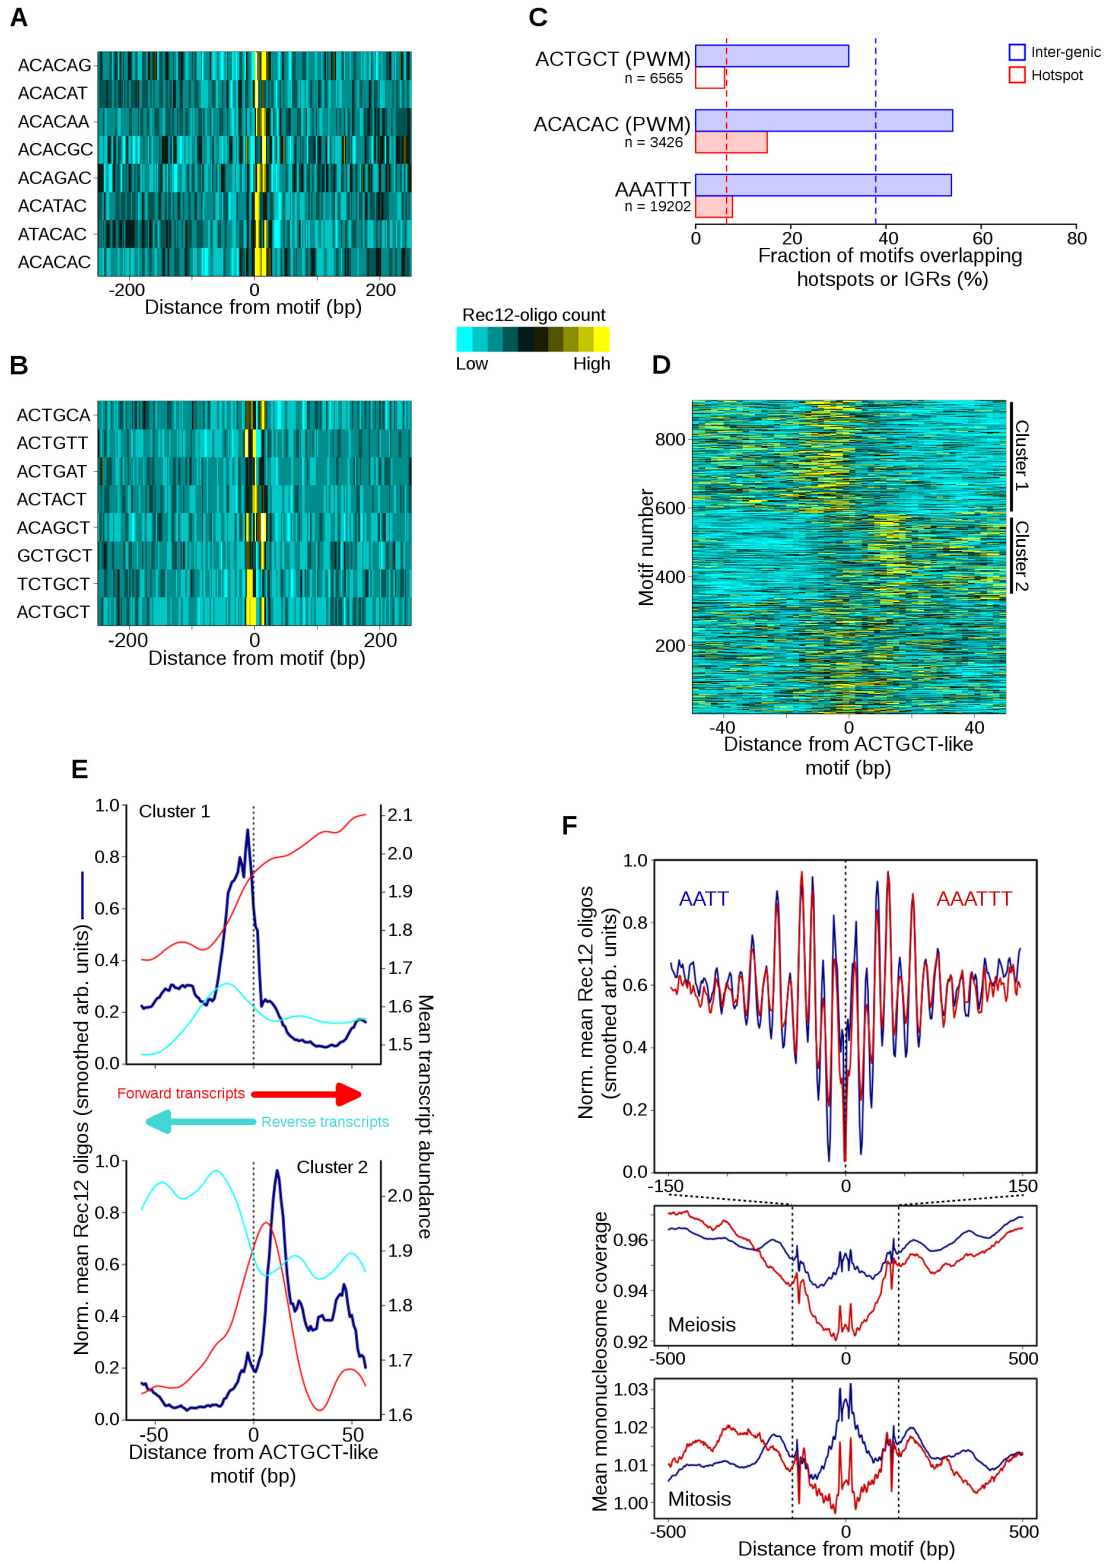

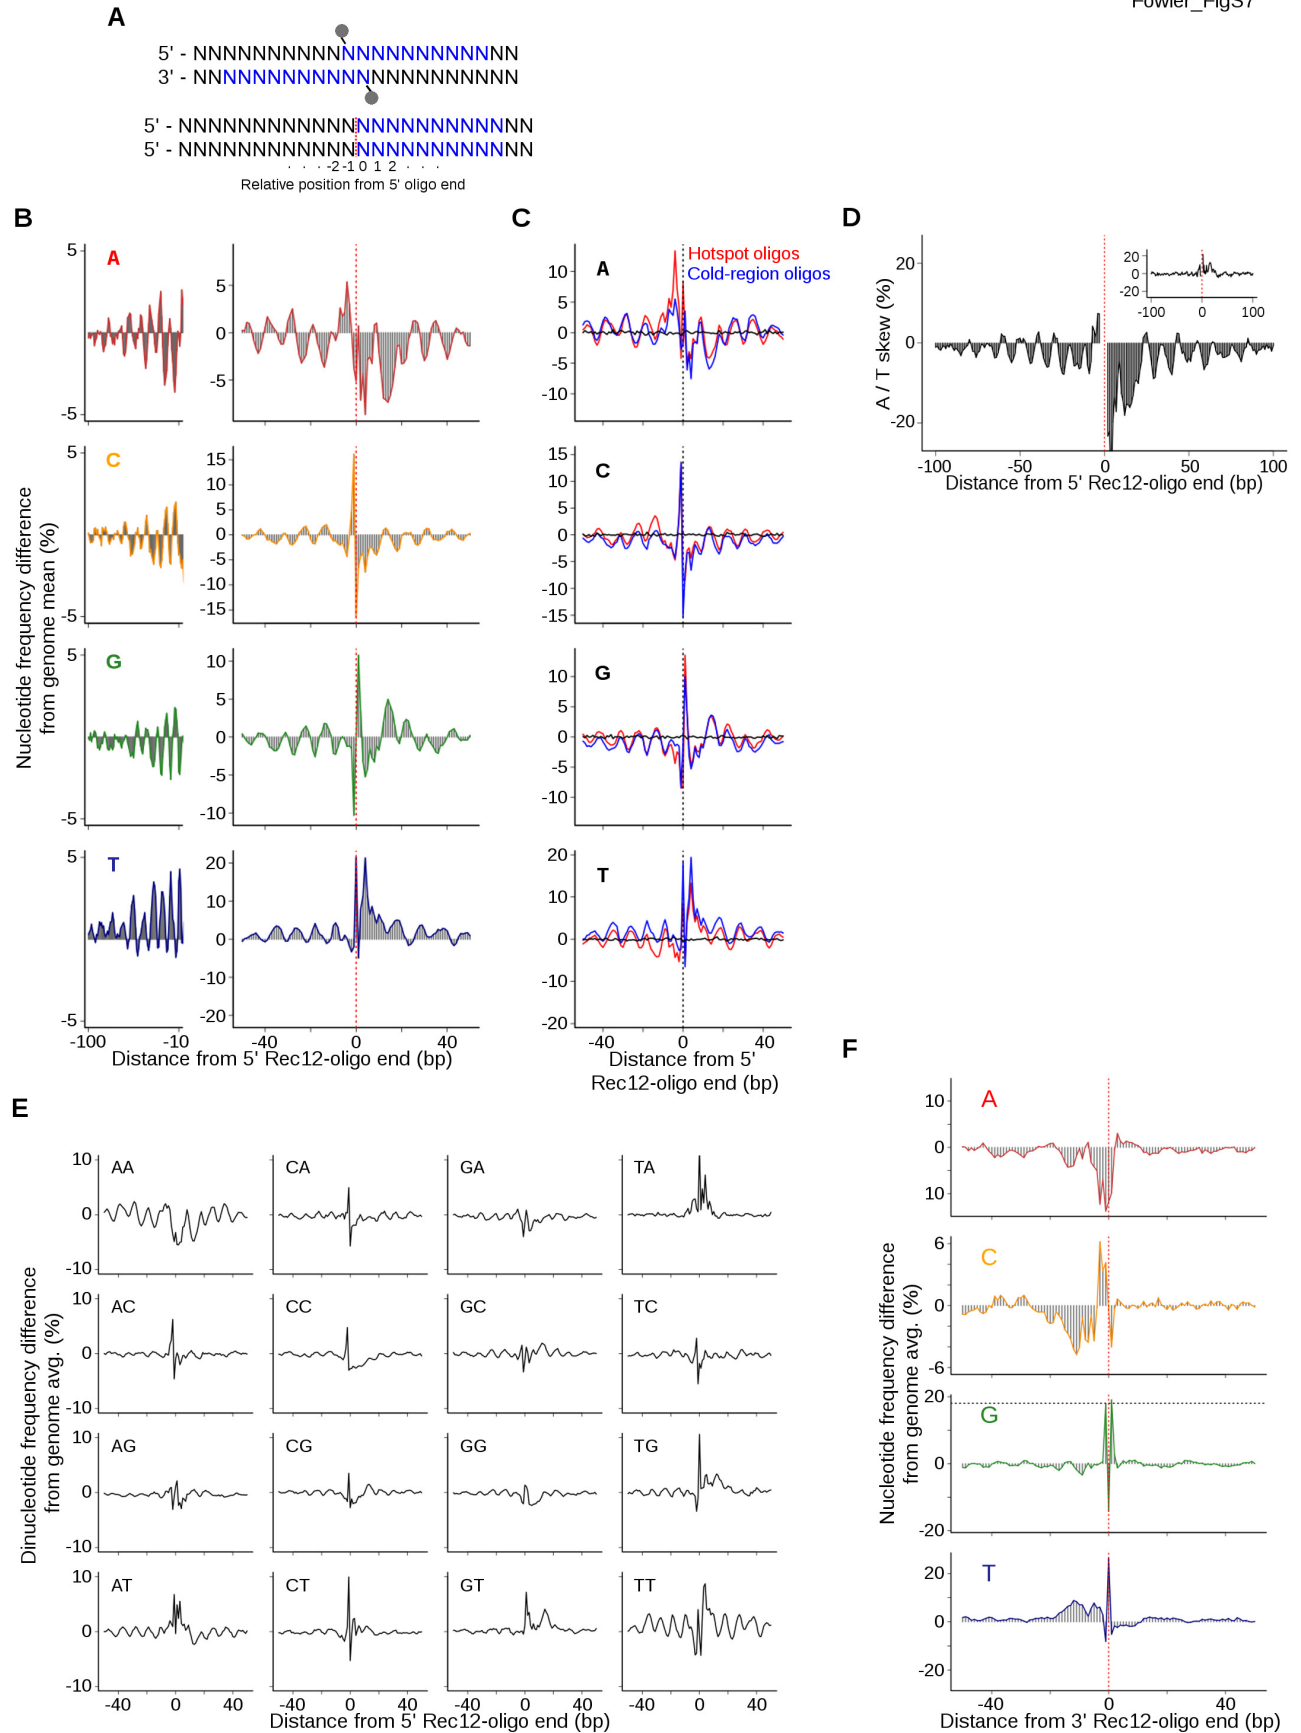

Supplement: supp_gr.172122.114_Supplemental_Figures.pdf [file supp_gr.172122.114_Supplemental_Figures.pdf]
